# Supplementary material for: Paradox of self-care gender differences among Italian patients with chronic heart failure: findings from a real-world cross-sectional study
Source: PubMed Central journal article supplement — BMJ Open. 2018 Sep 28;8(9):e021966. doi: 10.1136/bmjopen-2018-021966 (PMC6169756; doi:10.1136/bmjopen-2018-021966), 2018-09-28
Supplement: bmjopen-2018-021966.draft_revisions.pdf [file bmjopen-2018-021966.draft_revisions.pdf]

# BMJ Open

BMJ Open is committed to open peer review. As part of this commitment we make the peer review history of every article we publish publicly available.

When an article is published we post the peer reviewers' comments and the authors' responses online. We also post the versions of the paper that were used during peer review. These are the versions that the peer review comments apply to.

The versions of the paper that follow are the versions that were submitted during the peer review process. They are not the versions of record or the final published versions. They should not be cited or distributed as the published version of this manuscript.

BMJ Open is an open access journal and the full, final, typeset and author-corrected version of record of the manuscript is available on our site with no access controls, subscription charges or pay-per-view fees (<http://bmjopen.bmj.com>).

If you have any questions on BMJ Open's open peer review process please email [info.bmjopen@bmj.com](mailto:info.bmjopen@bmj.com)

# BMJ Open

## The paradox of self-care gender differences amongst Italian patients with Chronic Heart Failure: Findings from a real-world cross-sectional study

|                               |                                                                                                                                                                                                                                                             |
|-------------------------------|-------------------------------------------------------------------------------------------------------------------------------------------------------------------------------------------------------------------------------------------------------------|
| Journal:                      | <i>BMJ Open</i>                                                                                                                                                                                                                                             |
| Manuscript ID                 | bmjopen-2018-021966                                                                                                                                                                                                                                         |
| Article Type:                 | Research                                                                                                                                                                                                                                                    |
| Date Submitted by the Author: | 30-Jan-2018                                                                                                                                                                                                                                                 |
| Complete List of Authors:     | Dellafiore, Federica; IRCCS Policlinico San Donato<br>Pittella, Francesco; IRCCS Policlinico San Donato<br>Conte, Gianluca; IRCCS Policlinico San Donato<br>Magon , Arianna; IRCCS Policlinico San Donato<br>caruso, rosario; IRCCS Policlinico San Donato, |
| Keywords:                     | Heart failure < CARDIOLOGY, Clinical governance < HEALTH SERVICES<br>ADMINISTRATION & MANAGEMENT, Cardiology < INTERNAL MEDICINE                                                                                                                            |
|                               |                                                                                                                                                                                                                                                             |

SCHOLARONE™  
Manuscripts

View Only

1  
2  
3 Title:

4 **The paradox of self-care gender differences amongst Italian patients**  
5 **with Chronic Heart Failure: Findings from a real-world cross-**  
6 **sectional study**  
7  
8  
9

10 Authors:

11 *Federica Dellafiore*<sup>1</sup>, RN, MSc, PhD(s); *Francesco Pittella*<sup>1</sup>, RN, MSc; *Gianluca Conte*<sup>1</sup>, RN;  
12 *Arianna Magon*<sup>1</sup>, RN; *Rosario Caruso*<sup>1</sup>, PhD, RN  
13  
14  
15

16  
17 **Affiliation**

- 18 1. Health Professions Research and Development Unit, IRCCS Policlinic San Donato, San  
19 Donato Milanese, Italy  
20  
21  
22  
23

24 **Corresponding author**

25 Rosario Caruso, PhD, RN  
26 Head of Health Professions Research and Development Unit  
27 IRCCS Policlinico San Donato  
28 Via Agadir, 20-24  
29 20097 San Donato Milanese, Italy  
30 Phone: +39 0252774940  
31 Email: [rosario.caruso@unimi.it](mailto:rosario.caruso@unimi.it)  
32  
33  
34  
35  
36  
37  
38  
39  
40  
41  
42  
43  
44  
45  
46  
47  
48  
49  
50  
51  
52  
53  
54  
55  
56  
57  
58  
59  
60

## Abstract

**Aim.** The aim of this study was to critically analyse and describe the gender differences related to the self-care amongst patients with chronic HF.

**Methods and results.** A monocentric real-world cohort of 367 chronic HF patients in follow-up was used for this cross-sectional study. Data related to demographic and clinical characteristics were reported, and patients' self-care was assessed before their discharge using the Self-Care of Heart Failure Index. After the bivariate analysis, logistic regression models were used to describe the relations between gender, self-care behaviours and self-care confidence. Men have more than four times the likelihood of inadequate self-care maintenance than women (OR = 4.596; 95% CI = 1.075 – 19.650), while they have approximately 60% more likelihood of adequate self-care confidence than women (OR = 0.412; 95% CI = 0.104 – 0.962). Considering that self-care confidence is described as a positive predictor of behaviours, our results seem to lead towards a paradox. It is possible that patient–caregiver relationship mediates the effect of confidence to behaviours. Overall, the adequate level of self-care behaviours are a current issue, ranging from 7.6% to 18.0%.

**Conclusion.** This study sketched directions for future researches where elements related to patient–caregiver relationship need to be considered to plan adequate educational interventions, which are integrating part of the treatment. We suggest to routinely measure patients' self-care to best manage their follow-up and to adjust their daily life behaviours.

**Key Words.** Gender differences; Heart Failure; Self-Care; Self-Confidence; Self-Management; Self-Maintenance.

### Strengths and limitations of this study

- This is the first study in last five years aimed to deepen explore the gender differences in self-care amongst patient with chronic HL

- Gender differences are an important peculiarity of self-care, being also associated to the culture of people, and the possibility to adapt education intervention based on gender-specific characteristics
- Italian men have more than four time the likelihood of inadequate self-care maintenance than women, while they have approximately 60% more likelihood of adequate self-care confidence than women (This is a paradox: confidence is a positive predictor of maintenance)
- The understanding of gender difference facilitates the reduction of inequalities in healthcare delivery, giving the possibility to develop evidence-based education path
- Our findings are not generalizable abroad Italy, more cross-cultural investigations are needed

## Introduction

The rate of heart failure (HF) is steadily increasing worldwide, becoming an important public health issue.<sup>1,2</sup> It affects more than 15 million people in Europe, and its prevalence is rising over the 25% of the worldwide population within the 2030.<sup>3</sup> Currently, HF prevalence ranges from 0.4 to 2.3% amongst European and American adult population.<sup>4</sup> The causes of HF are mostly cardiac, such as myocardial, valves, pericardium, endocardium, or heart rhythm abnormalities.<sup>5</sup> Both those causes and the presence of multi-comorbidities often lead towards a chronic HF, where patients have to follow the available clinical recommendations to optimize their health, monitoring their symptoms and engaging proper decision-making to manage signs and symptoms when those occur.<sup>6,7</sup> Recent studies show how HF patient outcomes are closely linked to their self-care, which is the ability in maintaining health through health promoting practices and managing illness.<sup>7-10</sup>

Self-care is currently studied owing to a widespread middle range theory of reference,<sup>7</sup> which allows to investigate relations between self-care and clinical outcome in HF patients. Currently, we know that adequate self-care in HF patients is associated to a better quality of life,<sup>11,12</sup> reduced re-hospitalizations,<sup>13</sup> mortality,<sup>14</sup> and healthcare costs.<sup>14</sup> Evidence shows that after 3 months of educational interventions to improve self-care levels, the HF patients emotional quality of life improved as well as their overall health status.<sup>11,12</sup> Other studies show how inadequate self-care is an independent risk factor for adverse clinical outcomes in HF patients and re-hospitalisations, using Cox regression analysis adjusted for clinical parameters.<sup>13</sup> Moreover, other recent shows the increasing of the likelihood for death in those HF patients with have inadequate self-care.<sup>14</sup> A typical characteristic of patients with inadequate self-care is the decline in use of HF related medications over time (i.e., low adherence). This implies a more likelihood of re-hospitalization and an increase of the healthcare cost, while HF management in patient with adequate self-care requires lower economic healthcare resources.<sup>14</sup>

In this scenario, gender differences are an important peculiarity of self-care, being also associated to the culture of people, and the possibility to adapt education intervention based on

1  
2  
3 gender-specific characteristics, when those will be known. At this regard, the same European  
4 Governments ask for clarity and attention in research, due to the attention in understanding gender  
5 difference facilitates the reduction of inequalities in healthcare delivery, giving the possibility to  
6 develop evidence-based education path, adjusted for gender-specific demands to treat chronic HF  
7 patients.<sup>15</sup> Currently, we know that there are diverse results in studies related to gender differences  
8 in chronic HF, due to some researchers show that men have better behaviours than women,<sup>20</sup> while  
9 other studies show that men have lower level of self-care behaviours<sup>18</sup>. Overall, research has not yet  
10 been assessed in depth many aspects of self-care gender differences, such as the estimation of the  
11 likelihood of inadequate/adequate self-care in relation to the gender in real-world cohorts. For the  
12 above discussed characteristics of self-care, the understanding of peculiarities related to patients'  
13 gender difference in acting their self-care behaviours is strategic to plan a correct treatment and  
14 education.<sup>5,21</sup>

15  
16  
17  
18  
19  
20  
21  
22  
23  
24  
25  
26  
27  
28  
29 So far, there are no recent studies on self-care gender differences amongst patients with chronic  
30 HF, and generally the evidence underpinning the understanding of those differences are weak. For  
31 this reason, the aim of this study was to critically analyse and describe the gender differences  
32 related to the self-care amongst patients with chronic HF. The results of this study could be useful  
33 to frame our understanding of those differences, providing epidemiological information useful to  
34 plan future tailored interventions.

## 35 36 37 38 39 40 41 42 **Methods**

### 43 44 *Design and participants*

45  
46 This study had an observational, single-centre design, using a real-world and convenience  
47 sampling. All patients were followed in a single centre in Italy, San Donato (PSD), which is a  
48 research hospital in northern Italy. To be enrolled, all patients had to have a diagnosis of stable  
49 chronic HF and they had to have a recent cardiological assessment (maximum one week before).  
50 Thus, using a real-world sampling approach, all patients with chronic HF related to a cardiac cause  
51 and assessed by their cardiologist within the week prior to our proposal were eligible to be enrolled

1  
2  
3 in this study.<sup>22</sup> Cardiological clinical assessment of the enrolled patients was performed in  
4  
5 accordance to the current guidelines.<sup>5</sup> All the data were collected using a cross-sectional approach,  
6  
7 between January and September 2017. For this research purpose, a specific data collection was  
8  
9 used, and describe in the ‘Measures’ paragraph. The only exclusion criteria were: (a) inability to  
10  
11 read and speak Italian, (b) diagnosis of psychiatric or cognitive problems, (c) patients aged under  
12  
13 18. Although this study had a real-world sampling, those exclusion criteria were needed to ensure  
14  
15 the possibility to collect data using self-report instruments. All enrolled patients gave their written  
16  
17 consent to participate. This study was approved by the local Ethical Committee (822/PSD/2017).

### 19 *Measures*

21  
22 Data related to demographic and clinical characteristics were reported, and self-care was  
23  
24 assessed before the patients’ discharge using the Self-Care of Heart Failure Index (SCHFI v. 6.2).

25  
26 *Demographic and clinical characteristics.* Demographic and clinical characteristics to describe  
27  
28 the cohort were age, gender, nationality, Body Mass Index (BMI), New York Heart Association  
29  
30 (NYHA) functional classification, ejection fraction (EF), secondary cardiac diagnosis associated to  
31  
32 HF, and drug treatment. While the Cumulative Illness Rating Scale (CIRS) was used to control the  
33  
34 multi-morbidity,<sup>23</sup> due to our real-world approach. BMI was categorized in accordance to the  
35  
36 Centers for Disease Control and Prevention (CDC) recommendations (i.e., underweight, healthy  
37  
38 weight, overweight, obese).<sup>24</sup> NYHA classification and HF were reported in line with the current  
39  
40 guidelines.<sup>5</sup> CIRS was used to evaluate the multi-morbidity, considering the gravity of co-occurring  
41  
42 medical conditions in 14 main domains. Each domain represent a physio-pathological system, using  
43  
44 a scoring from zero to four for the assessment, where zero indicates ‘no problem’, and four  
45  
46 indicates ‘extremely severe problem’. The algorithm and the indication described by the CIRS  
47  
48 authors of reference allow to consider an overall score for comorbidities from zero to four.<sup>23</sup> For  
49  
50 this study, the authors used an online calculator, provided online by the Italian Society of  
51  
52 Haematology (<http://www.siematologia.it/LG/CIRS/CIRS.htm>).



1  
2  
3           *Self-Care of Heart Failure Index* (version 6.2). SCHFI is a self-report instrument to measure  
4 self-care in HF patients, using 22 items. It allows to measure self-care within a well-defined  
5 framework, due to that instrument was developed using a situation-specific theory of reference.<sup>25</sup>  
6  
7 The 22 items of the instrument are grouped in three scales to measure both the self-care behaviours  
8 (i.e., self-care maintenance and self-care management) and patients' self-efficacy in performing  
9 their behaviours (i.e., self-care confidence). According to Riegel and colleagues, patients' self-care  
10 confidence is theorized to have an effect on patients' behaviours self-care, not as an element of self-  
11 care per se.<sup>26</sup> The two behaviour measurements are the self-care maintenance and the self-care  
12 management. Self-care maintenance is referred to the level to which patients engage in behaviours  
13 aimed to maintain their stability, monitoring their signs and symptoms and adhering to their  
14 treatments. Conversely, self-care management is referred the patients' ability in recognizing  
15 symptoms, and in undertaking their treatment when needed (*e.g.*, consult a healthcare provider, or  
16 reduce fluid intake). Each scale of SCHFI uses a 4-point self-report response format, from one  
17 (never or rarely) to four (always or daily). To compute each scale scores, the raw scores have to be  
18 transformed in standardized scores from 0 to 100, following the procedure described in SCHFI  
19 validation studies.<sup>27,28</sup> Adequate self-care behaviours and self-care confidence are given by score  
20 higher than 70.<sup>27,28</sup>

#### 39 *Data analysis*

41           All data are checked to assess possible missing, errors or outliers, using the study of the  
42 frequency distribution. Missing data are managed using pairwise approach. The study of skewness  
43 was used to preliminary assess the distribution of the variables, followed by the Kolmogorov–  
44 Smirnov test. Continuous variables are expressed as mean and standard deviation (SD) for normally  
45 distributed data, while non-normally distributed variables are expressed as median and interquartile  
46 range (IQR). Categorical variables are described by numbers and percentages. All data were  
47 preliminary tested in the univariate analysis, where categorical variables were tested by contingency  
48 table analysis (i.e.,  $\chi^2$  test or Fisher exact test, when appropriate), and continuous variable were  
49  
50  
51  
52  
53  
54  
55  
56  
57  
58  
59  
60

1  
2 tested by Mann–Whitney U test or Student's t-test (when appropriate). Bivariate analysis to assess  
3 relations between gender and the other variables were performed using point-polyserial correlation  
4 (Rpp). Logistic regression (LR) models were used in the multivariable analysis to describe the  
5 gender differences related to the self-care maintenance, management and confidence. LR models  
6 were developed considering the univariate analysis interpretations and bivariate analysis, the  
7 theoretical rationale, the precautions to avoid model overfit,<sup>29</sup> the conformity with linear gradient  
8 for the included continuous variables, the control of possible collinearity amongst the independent  
9 variables, the study of statistical significance using both the Wald's  $\chi^2$  and the likelihood ratio test,  
10 the assessment of the Goodness-of-fit measures through the Hosmer–Lemeshow test, and the  
11 analysis of the Pseudo- $R^2$  (i.e., Cox & Snell; Nagelkerke and McFadden).<sup>29</sup> All predictor variables  
12 selected from the univariate analysis were entered simultaneously into the equation models to  
13 control for each other. Statistics were performed using SPSS software version 22 (IBM Corp.,  
14 Armonk, NY) and R Statistical Package (R Foundation for Statistical Computing, [http://www.r-](http://www.r-project.org)  
15 [project.org](http://www.r-project.org)). All tests were 2-tailed, setting a significance level of 5%.

## 32 Results

### 33 *Sample*

34  
35  
36  
37 A sample of 367 chronic HF patients was enrolled in this study. The patients' characteristics are  
38 shown in Table 1. The majority of patients were males ( $N = 256$ ; 74.0%), with an average age of  
39 65.1 years ( $SD = 13.6$ ). The mean of BMI was 26.95  $\text{Kg/m}^2$  ( $SD = 4.97$ ). The majority of them was  
40 classified in in NYHA class II ( $N = 199$ , 57.5%) with a preserved EF (pEF) ( $N = 163$ ; 47.1%). The  
41 secondary cardiac diagnosis associated to chronic HF was mainly the myocardial infarction ( $N =$   
42  $225$ ; 65.0%), followed by the hypertension ( $N = 176$ ; 50.9%) and atrial fibrillation ( $N = 111$ ;  
43 30.1%). Only 66 patients had an adequate self-care maintenance (18.0%), 28 patients had an  
44 adequate self-care management (7.6%), and 131 patients had an adequate self-confidence (35.7%).

45  
46  
47  
48  
49  
50  
51  
52  
53  
54 >Please add Table 1<

### 55 *Gender differences*

1  
2  
3 Considering the bivariate analysis, the gender (men = 1; women = 2) had a significant  
4 relationship only with CIRS (Rpp = 0.157; P-Value = 0.005), self-care maintenance (Rpp = -0.112;  
5 P-Value = 0,025) (where, Adequate self-care maintenance = 1; Inadequate self-care maintenance =  
6 2), self-care management (Rpp = -0.101; P-Value = 0,046) (where, Adequate self-care management  
7 = 1; Inadequate self-care management = 2), self-care confidence (Rpp = +0.158; P-Value = 0.011)  
8 (where, Adequate self-care confidence = 1; Inadequate self-care confidence = 2). Thus, men  
9 reported less comorbidities, lower scores of self-care maintenance and management, but higher self-  
10 care confidence.  
11  
12  
13  
14  
15  
16  
17  
18  
19

20 As shown in Table 2, the first LR model shows that the likelihood of inadequate self-care  
21 maintenance is decreased roughly by 80% when patients have adequate level of self-care  
22 confidence (OR = 0.188; 95% CI = 0.042 – 0.843) and self-care management (OR = 0.182; 95% CI  
23 = 0.037 – 0.892), while men have more than four time the likelihood of inadequate self-care  
24 maintenance than women (OR = 4.596; 95% CI = 1.075 – 19.650). The second LR model shows  
25 that the likelihood of inadequate self-care management is decreased roughly by the 83% when  
26 patients have adequate maintenance (OR = 0.171; 95% CI = 0.036 – 0.816). No associations  
27 between gender and self-care management are shown. The third LR model shows that the likelihood  
28 of inadequate self-care confidence is decreased roughly by 80% when patients have adequate level  
29 of self-care maintenance (OR = 0.211; 95% CI = 0.051 – 0.869), and men have approximately 60%  
30 more likelihood of adequate self-care confidence than women (OR = 0.412; 95% CI = 0.104 –  
31 0.962). Moreover, every point of decreasing in CIRS total score is associated to roughly 70%  
32 likelihood of adequate levels of self-care confidence (OR = 0.297; 95% CI = 0.102 – 0.865).  
33  
34  
35  
36  
37  
38  
39  
40  
41  
42  
43  
44  
45  
46  
47

48 >Please add Table 2<  
49

## 50 Discussion

51  
52  
53 To the best of our knowledge, this is the first study in last five years aimed to deepen explore the  
54 gender differences in self-care amongst patient with chronic HL. There is a growing interest in  
55 understanding self-care gender differences in chronic diseases,<sup>30</sup> especially in patients with chronic  
56  
57  
58  
59

1  
2  
3 HF, due to the enhancement of patients' self-care using adequate educational strategies is an  
4 integrating part of the treatment.<sup>5</sup> Gender differences are important peculiarities of self-care, owing  
5 to the fact that the same gender plays as a self-care determinant.<sup>18</sup> In according with current  
6  
7 knowledge,<sup>18</sup> this study confirms that Italian chronic HF patients have high frequency of inadequate  
8  
9 self-care. The added value of the current and general epidemiological description of self-care  
10  
11 amongst Italian chronic HF patients is given by the real-world sampling and who received a recent  
12  
13 cardiologic clinical assessment. In fact, differently from previous self-care description all the  
14  
15 patients in this study were enrolled close to their cardiologic visit, not in a moment of their follow-  
16  
17 up. In other words, this study gives a realistic picture of the situation of those chronic HF patients  
18  
19 that recently received a clinical assessment and indication to adjustment their therapy. Moreover,  
20  
21 the description of patients' self-care in our study is more alarming than the previous description.<sup>18</sup>  
22  
23 In previous descriptions, adequate self-care behaviours ranges from 14.5% to 24.4%,<sup>18</sup> while the  
24  
25 current adequate self-care description ranged from 7.6% to 18.0%. In this scenario, the description  
26  
27 of gender differences was clear, starting from the bivariate analysis interpretation – where self-care  
28  
29 behaviours and self-care confidence have a significant relationship with gender – towards the LR  
30  
31 models analysis.

32  
33  
34  
35  
36  
37 The focus of the gender differences analysis is important, due to it allows to early understand  
38  
39 where engage endeavours in develop evidence-based educational paths. It is reasonable, that  
40  
41 evidence arising from gender differences analysis need to be contextualized to the habits and culture  
42  
43 of the Country. For this reasons, the literature shows diverse results, when the few evidence from  
44  
45 different studies and Countries are compared. De facto, evidence coming from United States shows  
46  
47 that men are more likely to undertake independent decisions about their self-care management,  
48  
49 while women had higher self-care maintenance.<sup>20</sup> Conversely, considering the bivariate analysis of  
50  
51 this study, the point-polyserial correlations show that men seem to have low level of both self-care  
52  
53 management and maintenance, and higher level of self-care confidence, which is the task-specific  
54  
55  
56  
57  
58  
59  
60

1  
2  
3 patients' self-efficacy to face this their disease. Those results are in line with previous general  
4  
5 description amongst Italian patients.<sup>18</sup>  
6

7 More specifically, our LR models clearly allow to interpret the gender differences using the  
8  
9 multivariable approach, where self-care behaviours and self-care confidence are studied as  
10  
11 dichotomous outcomes (inadequate versus adequate). Therefore, our study provides useful means to  
12  
13 understand the associations between the included independent variables coming from the bivariate  
14  
15 description and the binary response self-care variables. Specifically, gender is significantly  
16  
17 associated to self-care maintenance and self-care confidence, where men have more than four time  
18  
19 the likelihood of inadequate self-care maintenance than women, and they also have approximately  
20  
21 60% more likelihood of adequate self-care confidence than women. This results lead to a paradox,  
22  
23 due to theory and evidence clearly indicate that self-care confidence positively predicts patients'  
24  
25 behaviours.<sup>7,31,32</sup> This paradox is also tangible in our results, if we consider that the same self-care  
26  
27 confidence is associated with adequate behaviours (**Table 2**), but men have more likelihood than  
28  
29 women to act inadequate self-care maintenance, even if they have roughly 60% more likelihood  
30  
31 than women to have adequate self-care confidence.  
32  
33  
34

35 In other words, it is reasonable that we are currently missing some important elements to frame  
36  
37 our understanding of gender differences in both Italian and general chronic HF patients. This  
38  
39 paradox need to be assessed by future investigations, due to the understanding of those gender  
40  
41 differences could guide tailored educational intervention, prior to the same patients' discharge.  
42  
43 Considering that patients' education is an integrant part of patients' treatment,<sup>5</sup> it is important to  
44  
45 frame the possible portrait underpinning the above described paradox, otherwise the same education  
46  
47 could be undermined by gaps in knowledge in determining the right educational approach for each  
48  
49 patient.  
50  
51

52 Very recently, some authors start to study the quality of the patient–caregiver relationship in  
53  
54 association to patients' self-care (i.e., mutuality).<sup>33,34</sup> It seems that patient–caregiver good mutuality  
55  
56 is associated to better patients' self-care. The mutuality studies shapes interdependence model  
57  
58  
59

1  
2  
3 paths, thus it could explain the paradox presented in our study, due to it is reasonable that patient–  
4 caregiver mutuality mediates the relations between self-care confidence and self-care behaviours. In  
5 other words, it is reasonable to speculate that men have a poor quality relation with their caregiver  
6 than women, when men’s caregiver have to contribute to help the same men to be adherent to their  
7 clinical recommendation, such as Sodium-restricted diet. If those hypothesis will be corroborate by  
8 empirical evidence, the emphasis in including patients’ caregiver in the educational path from the  
9 beginning needs to grow, addressing the testing of future tailored educational interventions, and  
10 educational models for the dyads patient–caregiver.<sup>35</sup>

### 19 *Strengths and limitations*

21  
22 This study has a number of limitations and strengths. Firstly, the design was cross-sectional  
23 and the sampling was not randomized, and patients were followed in a unique centre. Secondly, the  
24 major clinical implications in considering the self-care as the outcome of the study are not directly  
25 deducible in our results, but the clinical relevance is deducible acknowledging the previous solid  
26 evidence between self-care, hospitalisations, quality of life, healthcare costs, and mortality. Those  
27 aspects justify the clinical relevance of this study rationale. The monocentric sampling is a limit, but  
28 also a strength in our study, due to the topic of gender differences is closely related to the contextual  
29 culture, and this approach shows a realistic portrait of a reality of northern Italy. Another strength is  
30 the real-world sampling, which add value to the realistic sense of the investigation. Moreover, to the  
31 best of our knowledge, this is the first study that describes self-care as a dichotomous outcome,  
32 using LR models. This approach simplifies the epidemiological interpretation of self-care  
33 characteristics, owing to the likelihood interpretation coming from the adjusted OR of the  
34 independent variables of the models. In fact, self-care characteristics are usually studied using  
35 structural equation modelling approaches or path analysis, which are very useful latent multivariate  
36 approaches, but they are less intuitive under an epidemiological point of view.

## Conclusion

Patients' self-care is a core element of the multidisciplinary care management programme to reduce the risk of HF hospitalization and mortality. The clinical implications of adequate self-care are currently supported by high level of evidence, as highlighted in the available guidelines.<sup>5</sup> So far, some gaps are still present to frame our understanding of some peculiarities to best develop tailored educational intervention to support chronic HF patients, considering that they have to lifetime cope with recommendations, follow-ups, and life style adjustments. In this scenario, the understanding of self-care gender differences helps to address researches and educational interventions in order to correctly guide the healthcare providers' clinical practice. Our study helps to frame this kind of understanding, facing with the contradictory meanings of the findings to sketch the direction of future investigation, and to give some tips for clinical healthcare providers.

Considering the sketched directions for future researches, it is paramount to consider the complexity of the management of the chronic HF. In fact, to understand how explain gender differences in those patients' self-care, future studies should consider some aspects related to the quality of the patient-caregiver relationship, due to it could play a pivotal role in determine the actual patients' behaviours. In other words, the individual confidence in one's own ability to achieve the tasks related to recommendations, such as physical exercise, dietary habits or signs and symptoms recognitions' ability, could be mediated by the role of caregiver, who have to understand the recommendations as well as the patient. Future researches are needed to corroborate this framework.

This study results also highlight an important issue related to high frequency of patients with inadequate self-care. There is an urgent need of more awareness that the education during the hospitalisation and follow-up have to be effective in changing the patients' self-care behaviours. To boost attention towards this topic, and to guide the follow-ups educational priorities, we recommend to screen patients' self-care in a longitudinal way during their follow-up. It could be also useful to assess the quality of patient-caregiver relations, when it is possible. This particular assessment

could solve problems underpinning gender differences, even if robust evidence are strongly needed to corroborate this approach. Only validated instruments are suggested to perform those assessments.

To conclude, further cross-cultural exploration of self-care gender differences in patients with HF are needed to frame our knowledge in this field.

## References

1. Maggioni A Pietro. Epidemiology of Heart Failure in Europe. *Heart Fail Clin.* 2015;11(4):625-635. doi:10.1016/J.HFC.2015.07.015.
2. Acute Heart Failure Syndromes in the Elderly: The European Perspective. *Heart Fail Clin.* 2015;11(4):637-645. doi:10.1016/J.HFC.2015.07.010.
3. Go AS, Mozaffarian D, Roger VL, et al. Executive summary: heart disease and stroke statistics--2014 update: a report from the American Heart Association. *Circulation.* 2014;129(3):399-410. doi:10.1161/01.cir.0000442015.53336.12.
4. Mozaffarian D, Benjamin EJ, Go AS, et al. Heart disease and stroke statistics--2015 update: a report from the American Heart Association. *Circulation.* 2015;131(4):e29-322. doi:10.1161/CIR.000000000000152.
5. Ponikowski P, Voors AA, Anker SD, et al. 2016 ESC Guidelines for the diagnosis and treatment of acute and chronic heart failure: The Task Force for the diagnosis and treatment of acute and chronic heart failure of the European Society of Cardiology (ESC) Developed with the special contribution of. *Eur Heart J.* 2016;37(27):2129-2200. doi:10.1093/eurheartj/ehw128.
6. Ruppert TM, Delgado JM, Temple J. Medication adherence interventions for heart failure patients: A meta-analysis. *Eur J Cardiovasc Nurs.* 2015;14(5):395-404. doi:10.1177/1474515115571213.
7. Riegel B, Dickson VV, Faulkner KM. The Situation-Specific Theory of Heart Failure Self-Care: Revised and Updated. *J Cardiovasc Nurs.* 2016;31(3):226-235. doi:10.1097/JCN.0000000000000244.
8. Riegel B, Masterson Creber R, Hill J, Chittams J, Hoke L. Effectiveness of Motivational Interviewing in Decreasing Hospital Readmission in Adults With Heart Failure and Multimorbidity. *Clin Nurs Res.* 2016;25(4):362-377. doi:10.1177/1054773815623252.
9. Vellone E, Fida R, Ghezzi V, et al. Patterns of Self-care in Adults With Heart Failure and Their Associations With Sociodemographic and Clinical Characteristics, Quality of Life, and Hospitalizations: A Cluster Analysis. *J Cardiovasc Nurs.* 2017;32(2):180-189. doi:10.1097/JCN.0000000000000325.
10. Lee CS, Vellone E, Lyons KS, et al. Patterns and predictors of patient and caregiver engagement in heart failure care: a multi-level dyadic study. *Int J Nurs Stud.* 2015;52(2):588-597. doi:10.1016/j.ijnurstu.2014.11.005.
11. Dunbar SB, Reilly CM, Gary R, et al. Randomized Clinical Trial of an Integrated Self-Care Intervention for Persons with Heart Failure and Diabetes: Quality of Life and Physical Functioning Outcomes. *J Card Fail.* 2015;21(9). doi:10.1016/j.cardfail.2015.05.012.



12. Buck HG, Dickson VV, Fida R, et al. Predictors of hospitalization and quality of life in heart failure: A model of comorbidity, self-efficacy and self-care. *Int J Nurs Stud*. 2015;52(11):1714-1722. doi:10.1016/j.ijnurstu.2015.06.018.
13. Kato N, Kinugawa K, Nakayama E, et al. Insufficient self-care is an independent risk factor for adverse clinical outcomes in Japanese patients with heart failure. *Int Heart J*. 2013;54(6):382-389.
14. Smith CE, Piamjariyakul U, Wick JA, et al. Multidisciplinary group clinic appointments: the Self-Management and Care of Heart Failure (SMAC-HF) trial. *Circ Heart Fail*. 2014;7(6):888-894. doi:10.1161/CIRCHEARTFAILURE.113.001246.
15. Regitz-Zagrosek V. Sex and gender differences in health. Science & Society Series on Sex and Science. *EMBO Rep*. 2012;13(7). doi:10.1038/embor.2012.87.
16. Roswall N, Olsen A, Boll K, et al. Consumption of predefined “Nordic” dietary items in ten European countries – an investigation in the European Prospective Investigation into Cancer and Nutrition (EPIC) cohort. *Public Health Nutr*. 2014;17(12):2650-2659. doi:10.1017/S1368980014000159.
17. Chung ML, Moser DK, Lennie TA, et al. Gender Differences in Adherence to the Sodium-Restricted Diet in Patients With Heart Failure. *J Card Fail*. 2006;12(8):628-634. doi:10.1016/j.cardfail.2006.07.007.
18. Cocchieri A, Riegel B, D’Agostino F, et al. Describing self-care in Italian adults with heart failure and identifying determinants of poor self-care. *Eur J Cardiovasc Nurs*. 2015;14(2):126-136. doi:10.1177/1474515113518443.
19. Cameron J, Worrall-Carter L, Riegel B, Lo SK, Stewart S. Testing a model of patient characteristics, psychologic status, and cognitive function as predictors of self-care in persons with chronic heart failure. *Hear Lung J Acute Crit Care*. 2009;38(5):410-418. doi:10.1016/j.hrtlng.2008.11.004.
20. Dickson VV, Worrall-Carter L, Kuhn L, Riegel B. Whose job is it? Gender differences in perceived role in heart failure self-care. *J Nurs Healthc Chronic Illn*. 2011;3(2):99-108. doi:10.1111/j.1752-9824.2011.01084.x.
21. Ausili D, Rebora P, Di Mauro S, et al. Clinical and socio-demographic determinants of self-care behaviours in patients with heart failure and diabetes mellitus: A multicentre cross-sectional study. *Int J Nurs Stud*. 2016;63:18-27. doi:10.1016/j.ijnurstu.2016.08.006.
22. Farré N, Vela E, Clèries M, et al. Real world heart failure epidemiology and outcome: A population-based analysis of 88,195 patients. *PLoS One*. 2017;12(2):e0172745. doi:10.1371/journal.pone.0172745.
23. Miller MD, Paradis CF, Houck PR, et al. Rating chronic medical illness burden in geropsychiatric practice and research: application of the Cumulative Illness Rating Scale. *Psychiatry Res*. 1992;41(3):237-248.
24. Centers of Disease Control and Prevention (CDC). Assessing Your Weight | Healthy Weight | CDC. <https://www.cdc.gov/healthyweight/assessing/index.html>. Accessed October 30, 2017.
25. Riegel B, Carlson B, Moser DK, Sebern M, Hicks FD, Roland V. Psychometric testing of the self-care of heart failure index. *J Card Fail*. 2004;10(4):350-360.
26. Riegel B, Lee CS, Dickson VV, Carlson B. An update on the self-care of heart failure index. *J Cardiovasc Nurs*. 2009;24(6):485-497. doi:10.1097/JCN.0b013e3181b4baa0.
27. Riegel B, Carlson B, Moser DK, Sebern M, Hicks FD, Roland V. Psychometric testing of the self-care of heart failure index. *J Card Fail*. 2004;10(4):350-360.
28. Vellone E, Riegel B, Cocchieri A, et al. Psychometric testing of the Self-Care of Heart Failure Index Version 6.2. *Res Nurs Health*. 2013;36(5):500-511. doi:10.1002/nur.21554.
29. Sun GW, Shook TL, Kay GL. Inappropriate use of bivariable analysis to screen risk factors for use in

- 1  
2  
3 multivariable analysis. *J Clin Epidemiol*. 1996;49(8):907-916.
- 4  
5 30. Caruso R, Arrigoni C, Magon A, et al. Health determinants in italian type 2 diabetes Mellitus  
6 (T2DM) patients: A critical gender differences analysis. *J Res Genet Stud*. 2017;7(2):93-108.  
7 doi:10.22381/JRGS7220176.
- 8  
9 31. Riegel B, Jaarsma T, Strömberg A. A middle-range theory of self-care of chronic illness. *ANS Adv  
10 Nurs Sci*. 2012;35(3):194-204. doi:10.1097/ANS.0b013e318261b1ba.
- 11  
12 32. Vellone E, Pancani L, Greco A, Steca P, Riegel B. Self-care confidence may be more important than  
13 cognition to influence self-care behaviors in adults with heart failure: Testing a mediation model. *Int  
14 J Nurs Stud*. 2016;60:191-199. doi:10.1016/j.ijnurstu.2016.04.016.
- 15  
16 33. Hooker SA, Schmiede SJ, Trivedi RB, Amoyal NR, Bekelman DB. Mutuality and heart failure self-  
17 care in patients and their informal caregivers. *Eur J Cardiovasc Nurs*. September 2017:Epub ahead of  
18 print. doi:10.1177/1474515117730184.
- 19  
20 34. Vellone E, Dellafiore F, Chung ML, Alvaro R. Mutuality and self-care in heart failure patient and  
21 caregiver dyads. *Eur J Cardiovasc Nurs*. October 2017:1-2. doi:10.1177/1474515117740482.
- 22  
23 35. Vellone E, Paturzo M, D'Agostino F, et al. MOTIVATional intErviewing to improve self-care in  
24 Heart Failure patients (MOTIVATE-HF): Study protocol of a three-arm multicenter randomized  
25 controlled trial. *Contemp Clin Trials*. 2017;55:34-38. doi:10.1016/j.cct.2017.02.003.
- 26  
27  
28  
29  
30  
31  
32  
33  
34  
35  
36  
37  
38  
39  
40  
41  
42  
43  
44  
45  
46  
47  
48  
49  
50  
51  
52  
53  
54  
55  
56  
57  
58  
59  
60

1  
2  
3 Statements  
4  
5  
6

7 **Conflict of interest.** The authors declare no conflict of interest.  
8  
9

10 **Funding.** This study was funded by local research funds of the IRCCS Policlinico San Donato, a  
11 Clinical Research Hospital partially funded by the Italian Ministry of Health  
12  
13

14 **Acknowledgements.** We wish to thank all the study participants and the data managers for the  
15 support in collecting and record the case form reports.  
16  
17  
18

19 **Role of Authors.** FD and RC: conceived the study, supervised the collection and data analysis, and  
20 wrote the initial manuscript draft. FP, AM and GC: contributed to data collection, and analysis,  
21 revising the manuscript critically for important intellectual content. All authors: provided guidance  
22 on the analytical approach, contributed to the interpretation of results, and drafted and revised the  
23 manuscript for critical intellectual content.  
24  
25  
26  
27

28 **Data sharing statement.** We intend to make data freely available in the public domain after  
29 publication of major findings. Researchers interested in collaborations should contact the  
30 corresponding author ([rosario.caruso@unimi.it](mailto:rosario.caruso@unimi.it))  
31  
32  
33  
34  
35  
36  
37  
38  
39  
40  
41  
42  
43  
44  
45  
46  
47  
48  
49  
50  
51  
52  
53  
54  
55  
56  
57  
58  
59  
60

**Table 1.** Sample characteristics (N = 346)

| <b>Demography</b>                         | <i>N</i> (%) |
|-------------------------------------------|--------------|
| Mean (SD), Age (Years)                    | 65.6 (13.6)  |
| Gender (male/female)                      | 61.1%/38.9%  |
| Nationality (Italian)                     | 100%         |
| <b>Anthropometry</b>                      |              |
| Mean (SD), BMI (kg/m <sup>2</sup> )       | 26.95 (4.97) |
| <b>Clinical characteristics</b>           |              |
| Class II                                  | 256 (74.0%)  |
| Class III                                 | 82 (23.7%)   |
| Class IV                                  | 8 (2.3%)     |
| rEF (<40%)                                | 82 (23.7%)   |
| MrEF (40-50%)                             | 101 (29.2%)  |
| pEF (≥50%)                                | 163 (47.1%)  |
| CIRS total score 0                        | 270 (78.0%)  |
| CIRS total score 1                        | 50 (14.5%)   |
| CIRS total score 2                        | 26 (7.5%)    |
| <b>Secondary Cardiac Diagnosis</b>        |              |
| Myocardial Infarction                     | 225 (65.0%)  |
| Hypertension                              | 176 (50.9%)  |
| Atrial Fibrillation                       | 111 (30.1%)  |
| <b>Drug treatment</b>                     |              |
| ACE inhibitors                            | 73 (21.1%)   |
| B-blockers                                | 87 (25.1%)   |
| Diuretics                                 | 270 (78.0%)  |
| Cardiac glycosides                        | 160 (46.2%)  |
| Aspirin or salicylates                    | 222 (64.2%)  |
| Calcium channel blockers                  | 74 (21.4%)   |
| <b>'Adequate' Self-care (scores ≥ 70)</b> |              |
| Maintenance                               | 66 (18.0%)   |
| Management                                | 28 (7.6%)    |
| Confidence                                | 131 (35.7%)  |

**Table 2.** Models of Logistic Regression analysis

| <b>Maintenance</b> |                                      |                                   |             |                |                                                      |                                                 |                                               |
|--------------------|--------------------------------------|-----------------------------------|-------------|----------------|------------------------------------------------------|-------------------------------------------------|-----------------------------------------------|
| <b>Predictors</b>  |                                      | <b>Wald's <math>\chi^2</math></b> | <b>d.f.</b> | <b>P-Value</b> | <b>Odds Ratio</b>                                    | <b>95% CI</b>                                   |                                               |
|                    | Constant                             | 2.356                             | 1           | 0.125          | -                                                    | -                                               | -                                             |
|                    | Confidence (Adequate vs Inadequate)  | 4.767                             | 1           | 0.029          | 0.188                                                | 0.042                                           | 0.843                                         |
|                    | Management (Adequate vs Inadequate)  | 4.413                             | 1           | 0.036          | 0.182                                                | 0.037                                           | 0.892                                         |
|                    | CIRS                                 | 2.314                             | 1           | 0.128          | 2.909                                                | 0.735                                           | 11.512                                        |
|                    | Gender (Male vs Female)              | 4.232                             | 1           | 0.04           | 4.596                                                | 1.075                                           | 19.650                                        |
| <b>Model</b>       |                                      | <b><math>\chi^2</math></b>        | <b>d.f.</b> | <b>P-Value</b> | <b>Pseudo-<math>R^2</math><br/>(Cox &amp; Snell)</b> | <b>Pseudo-<math>R^2</math><br/>(Nagelkerke)</b> | <b>Pseudo-<math>R^2</math><br/>(McFadden)</b> |
|                    | Likelihood ratio test                | 18.69                             | 9           | 0.028          | 0.241                                                | 0.351                                           | 0.238                                         |
|                    | Hosmer–Lemeshow test                 | 4.185                             | 6           | 0.665          | -                                                    | -                                               | -                                             |
| <b>Management</b>  |                                      |                                   |             |                |                                                      |                                                 |                                               |
| <b>Predictors</b>  |                                      | <b>Wald's <math>\chi^2</math></b> | <b>d.f.</b> | <b>P-Value</b> | <b>Odds Ratio</b>                                    | <b>95% CI</b>                                   |                                               |
|                    | Constant                             | 0.799                             | 1           | 0.271          | -                                                    | -                                               | -                                             |
|                    | Confidence (Adequate vs Inadequate)  | 1.992                             | 1           | 0.158          | 0.318                                                | 0.065                                           | 1.561                                         |
|                    | Maintenance (Adequate vs Inadequate) | 4.902                             | 1           | 0.027          | 0.171                                                | 0.036                                           | 0.816                                         |
|                    | CIRS                                 | 0.265                             | 1           | 0.607          | 0.729                                                | 0.219                                           | 2.429                                         |
|                    | Gender (Male vs Female)              | 0.88                              | 1           | 0.348          | 2.126                                                | 0.440                                           | 10.284                                        |
| <b>Model</b>       |                                      | <b><math>\chi^2</math></b>        | <b>d.f.</b> | <b>P-Value</b> | <b>Pseudo-<math>R^2</math><br/>(Cox &amp; Snell)</b> | <b>Pseudo-<math>R^2</math><br/>(Nagelkerke)</b> | <b>Pseudo-<math>R^2</math><br/>(McFadden)</b> |
|                    | Likelihood ratio test                | 16.3                              | 9           | 0.049          | 0.218                                                | 0.336                                           | 0.241                                         |
|                    | Hosmer–Lemeshow test                 | 3.404                             | 6           | 0.696          | -                                                    | -                                               | -                                             |
| <b>Confidence</b>  |                                      |                                   |             |                |                                                      |                                                 |                                               |
| <b>Predictors</b>  |                                      | <b>Wald's <math>\chi^2</math></b> | <b>d.f.</b> | <b>P-Value</b> | <b>Odds Ratio</b>                                    | <b>95%CI</b>                                    |                                               |
|                    | Constant                             | 2.758                             | 1           | 0.097          | -                                                    | -                                               | -                                             |
|                    | Maintenance (Adequate vs Inadequate) | 4.644                             | 1           | 0.031          | 0.211                                                | 0.051                                           | 0.869                                         |
|                    | Management (Adequate vs Inadequate)  | 1.906                             | 1           | 0.167          | 0.332                                                | 0.069                                           | 1.589                                         |
|                    | CIRS                                 | 4.953                             | 1           | 0.026          | 0.297                                                | 0.102                                           | 0.865                                         |
|                    | Gender (Male vs Female)              | 1.474                             | 1           | 0.035          | 0.412                                                | 0.104                                           | 0.962                                         |

| Model                 | $\chi^2$ | d.f. | P-Value | Pseudo- $R^2$<br>(Cox & Snell) | Pseudo- $R^2$<br>(Nagelkerke) | Pseudo- $R^2$<br>(McFadden) |
|-----------------------|----------|------|---------|--------------------------------|-------------------------------|-----------------------------|
| Likelihood ratio test | 17.8     | 9    | 0.044   | 0.221                          | 0.314                         | 0.221                       |
| Hosmer–Lemeshow test  | 1.604    | 4    | 0.708   | -                              | -                             | -                           |

Abbreviations: CIRS, Cumulative Illness Rating Scale; d.f., degree of freedom; CI, Confidence Interval

For peer review only

**STROBE 2007 (v4) Statement—Checklist of items that should be included in reports of *cross-sectional studies***

| Section/Topic             | Item # | Recommendation                                                                                                                                                                       | Reported on page # |
|---------------------------|--------|--------------------------------------------------------------------------------------------------------------------------------------------------------------------------------------|--------------------|
| <b>Title and abstract</b> | 1      | (a) Indicate the study’s design with a commonly used term in the title or the abstract                                                                                               | 1-2                |
|                           |        | (b) Provide in the abstract an informative and balanced summary of what was done and what was found                                                                                  | 2                  |
| <b>Introduction</b>       |        |                                                                                                                                                                                      |                    |
| Background/rationale      | 2      | Explain the scientific background and rationale for the investigation being reported                                                                                                 | 4-5                |
| Objectives                | 3      | State specific objectives, including any prespecified hypotheses                                                                                                                     | 5                  |
| <b>Methods</b>            |        |                                                                                                                                                                                      |                    |
| Study design              | 4      | Present key elements of study design early in the paper                                                                                                                              | 5                  |
| Setting                   | 5      | Describe the setting, locations, and relevant dates, including periods of recruitment, exposure, follow-up, and data collection                                                      | 5-6                |
| Participants              | 6      | (a) Give the eligibility criteria, and the sources and methods of selection of participants                                                                                          | 5-6                |
| Variables                 | 7      | Clearly define all outcomes, exposures, predictors, potential confounders, and effect modifiers. Give diagnostic criteria, if applicable                                             | 6-7                |
| Data sources/ measurement | 8*     | For each variable of interest, give sources of data and details of methods of assessment (measurement). Describe comparability of assessment methods if there is more than one group | 6-7                |
| Bias                      | 9      | Describe any efforts to address potential sources of bias                                                                                                                            | 7                  |
| Study size                | 10     | Explain how the study size was arrived at                                                                                                                                            | 5                  |
| Quantitative variables    | 11     | Explain how quantitative variables were handled in the analyses. If applicable, describe which groupings were chosen and why                                                         | 7-8                |
| Statistical methods       | 12     | (a) Describe all statistical methods, including those used to control for confounding                                                                                                | 7-8                |
|                           |        | (b) Describe any methods used to examine subgroups and interactions                                                                                                                  | 7-8                |
|                           |        | (c) Explain how missing data were addressed                                                                                                                                          | 7-8                |
|                           |        | (d) If applicable, describe analytical methods taking account of sampling strategy                                                                                                   | na                 |
|                           |        | (e) Describe any sensitivity analyses                                                                                                                                                | 7-8                |
| <b>Results</b>            |        |                                                                                                                                                                                      |                    |

|                          |     |                                                                                                                                                                                                                                                                                                                                                                                                               |                   |
|--------------------------|-----|---------------------------------------------------------------------------------------------------------------------------------------------------------------------------------------------------------------------------------------------------------------------------------------------------------------------------------------------------------------------------------------------------------------|-------------------|
| Participants             | 13* | (a) Report numbers of individuals at each stage of study—eg numbers potentially eligible, examined for eligibility, confirmed eligible, included in the study, completing follow-up, and analysed<br>(b) Give reasons for non-participation at each stage<br>(c) Consider use of a flow diagram                                                                                                               | 8                 |
| Descriptive data         | 14* | (a) Give characteristics of study participants (eg demographic, clinical, social) and information on exposures and potential confounders<br>(b) Indicate number of participants with missing data for each variable of interest                                                                                                                                                                               | 8                 |
| Outcome data             | 15* | Report numbers of outcome events or summary measures                                                                                                                                                                                                                                                                                                                                                          | 8-9               |
| Main results             | 16  | (a) Give unadjusted estimates and, if applicable, confounder-adjusted estimates and their precision (eg, 95% confidence interval). Make clear which confounders were adjusted for and why they were included<br>(b) Report category boundaries when continuous variables were categorized<br>(c) If relevant, consider translating estimates of relative risk into absolute risk for a meaningful time period | 8-9<br>8-9<br>8-9 |
| Other analyses           | 17  | Report other analyses done—eg analyses of subgroups and interactions, and sensitivity analyses                                                                                                                                                                                                                                                                                                                | na                |
| <b>Discussion</b>        |     |                                                                                                                                                                                                                                                                                                                                                                                                               |                   |
| Key results              | 18  | Summarise key results with reference to study objectives                                                                                                                                                                                                                                                                                                                                                      | 9-10-11           |
| Limitations              | 19  | Discuss limitations of the study, taking into account sources of potential bias or imprecision. Discuss both direction and magnitude of any potential bias                                                                                                                                                                                                                                                    | 11                |
| Interpretation           | 20  | Give a cautious overall interpretation of results considering objectives, limitations, multiplicity of analyses, results from similar studies, and other relevant evidence                                                                                                                                                                                                                                    | 11-12             |
| Generalisability         | 21  | Discuss the generalisability (external validity) of the study results                                                                                                                                                                                                                                                                                                                                         | 12                |
| <b>Other information</b> |     |                                                                                                                                                                                                                                                                                                                                                                                                               |                   |
| Funding                  | 22  | Give the source of funding and the role of the funders for the present study and, if applicable, for the original study on which the present article is based                                                                                                                                                                                                                                                 | 16                |

\*Give information separately for cases and controls in case-control studies and, if applicable, for exposed and unexposed groups in cohort and cross-sectional studies.

**Note:** An Explanation and Elaboration article discusses each checklist item and gives methodological background and published examples of transparent reporting. The STROBE checklist is best used in conjunction with this article (freely available on the Web sites of PLoS Medicine at <http://www.plosmedicine.org/>, Annals of Internal Medicine at <http://www.annals.org/>, and Epidemiology at <http://www.epidem.com/>). Information on the STROBE Initiative is available at [www.strobe-statement.org](http://www.strobe-statement.org).



# BMJ Open

## The paradox of self-care gender differences amongst Italian patients with Chronic Heart Failure: Findings from a real-world cross-sectional study

|                                 |                                                                                                                                                                                                                                                                                                        |
|---------------------------------|--------------------------------------------------------------------------------------------------------------------------------------------------------------------------------------------------------------------------------------------------------------------------------------------------------|
| Journal:                        | <i>BMJ Open</i>                                                                                                                                                                                                                                                                                        |
| Manuscript ID                   | bmjopen-2018-021966.R1                                                                                                                                                                                                                                                                                 |
| Article Type:                   | Research                                                                                                                                                                                                                                                                                               |
| Date Submitted by the Author:   | 15-May-2018                                                                                                                                                                                                                                                                                            |
| Complete List of Authors:       | Dellafiore, Federica; IRCCS Policlinico San Donato<br>Arrigoni, Cristina; University of Pavia<br>Pittella, Francesco; IRCCS Policlinico San Donato<br>Conte, Gianluca; IRCCS Policlinico San Donato<br>Magon , Arianna; IRCCS Policlinico San Donato<br>caruso, rosario; IRCCS Policlinico San Donato, |
| <b>Primary Subject Heading</b>: | Cardiovascular medicine                                                                                                                                                                                                                                                                                |
| Secondary Subject Heading:      | Cardiovascular medicine, Nursing                                                                                                                                                                                                                                                                       |
| Keywords:                       | Heart failure < CARDIOLOGY, Clinical governance < HEALTH SERVICES ADMINISTRATION & MANAGEMENT, Cardiology < INTERNAL MEDICINE                                                                                                                                                                          |
|                                 |                                                                                                                                                                                                                                                                                                        |

SCHOLARONE™  
Manuscripts

Only

1  
2  
3 Title:

4 **The paradox of self-care gender differences amongst Italian patients**  
5 **with Chronic Heart Failure: Findings from a real-world cross-**  
6 **sectional study**  
7  
8

9  
10 Authors:

11 *Federica Dellafiore*<sup>1</sup>, RN, MSc, PhD(s); *Cristina Arrigoni*<sup>2</sup>, RN, MSc; *Francesco Pittella*<sup>1</sup>, RN,  
12 MSc; *Gianluca Conte*<sup>1</sup>, RN; *Arianna Magon*<sup>1</sup>, RN; *Rosario Caruso*<sup>1</sup>, PhD, RN  
13  
14

15  
16  
17 **Affiliation**

- 18 1. Health Professions Research and Development Unit, IRCCS Policlinic San Donato, San  
19 Donato Milanese, Italy  
20  
21 2. Department of Public Health, Experimental and Forensic Medicine, Unit of Hygiene,  
22 University of Pavia, Italy  
23  
24  
25  
26  
27

28 **Corresponding author**

29 Rosario Caruso, PhD, RN  
30 Head of Health Professions Research and Development Unit  
31 IRCCS Policlinico San Donato  
32 Via Agadir, 20-24  
33 20097 San Donato Milanese, Italy  
34 Phone: +39 0252774940  
35 Email: [rosario.caruso@unimi.it](mailto:rosario.caruso@unimi.it)  
36  
37  
38  
39  
40  
41  
42  
43  
44  
45  
46  
47  
48  
49  
50  
51  
52  
53  
54  
55  
56  
57  
58  
59  
60

1  
2  
3 Statements  
4  
5  
6

7 **Conflict of interest.** The authors declare no conflict of interest.  
8  
9

10 **Funding.** This study was funded by local research funds of the IRCCS Policlinico San Donato, a  
11 Clinical Research Hospital partially funded by the Italian Ministry of Health  
12  
13

14 **Acknowledgements.** We wish to thank all the study participants, patient advisers, and the data  
15 managers for the support in collecting and record the case form reports.  
16  
17

18  
19 **Role of Authors.** FD and RC: conceived the study, supervised the collection and data analysis, and  
20 wrote the initial manuscript draft. FP, CA, AM and GC: contributed to data collection, and analysis,  
21 revising the manuscript critically for important intellectual content. All authors: provided guidance  
22 on the analytical approach, contributed to the interpretation of results, and drafted and revised the  
23 manuscript for critical intellectual content.  
24  
25  
26  
27

28 **Data sharing statement.** We intend to make data freely available in the public domain after  
29 publication of major findings. Researchers interested in collaborations should contact the  
30 corresponding author ([rosario.caruso@unimi.it](mailto:rosario.caruso@unimi.it))  
31  
32  
33  
34  
35  
36  
37  
38  
39  
40  
41  
42  
43  
44  
45  
46  
47  
48  
49  
50  
51  
52  
53  
54  
55  
56  
57  
58  
59  
60

## Abstract

**Aim.** The aim of this study was to critically analyse and describe gender differences related to self-care amongst patients with chronic heart failure (HF).

**Methods and results.** A monocentric real-world cohort of 367 chronic HF patients in follow-up were used for this cross-sectional study. We report data related to the cohort's demographic and clinical characteristics. Self-care was assessed using the Self-Care of Heart Failure Index before patients' discharge. After bivariate analysis, logistical regression models were used to describe the relationship between gender, self-care behaviours and self-care confidence. While males were found to have more than quadruple the risk of poor self-care than women (OR=4.596; 95% CI=1.075–19.650), males were also found to be approximately 60% more likely to have adequate self-care confidence than women (OR=0.412; 95% CI=0.104–0.962). Considering that self-care confidence is described as a positive predictor of behaviours, our results suggest a paradox. It is possible that the patient–caregiver relationship mediates the effect of confidence on behaviours. Overall, adequate levels of self-care behaviours are a current issue, ranging 7.6–18.0%.

**Conclusion.** This study sets the stage for future research where elements of the patient–caregiver relationship ought to be considered to inform the planning of appropriate educational interventions. We recommend routinely measuring patients' self-care behaviours to guide their follow-up and as a basis for any changes in their daily life behaviours.

**Key Words.** Gender differences; Heart Failure; Self-Care; Self-Confidence; Self-Management; Self-Maintenance.

### Strengths and limitations of this study

- This is the first study in the last 5 years aimed at exploring gender differences in self-care amongst patients with chronic heart failure (HF).
- Gender differences are an important determinant of self-care, with gender-based self-care behaviours being culturally determined. As such, gender-specific educational interventions may be effective in influencing these gender-based self-care behaviours.
- Italian men have more than quadruple the risk of poor self-care than women, while also being approximately 60% more likely to have adequate self-care confidence than women. Paradoxically, confidence is usually a positive predictor of self-care maintenance.
- Understanding gender differences in patients' responses to pathology is a necessary precursor to reducing inequalities in healthcare delivery and allows for the development of targeted evidence-based educational interventions.
- Our findings are not generalisable outside of Italy; as such, more cross-cultural investigations are needed.

## Introduction

The rate of heart failure (HF) is steadily increasing worldwide, becoming an important public health issue.<sup>1,2</sup> HF affects more than 15 million people in Europe and its prevalence is rising, with the global prevalence of HF expected to reach 25% by 2030.<sup>3</sup> Currently, the prevalence of HF amongst European and American adults ranges 0.4–2.3%.<sup>4</sup> The most common causes of HF are related to issues with the valves, myocardium, pericardium, endocardium, or heart rhythm abnormalities.<sup>5</sup> These, along with multiple comorbidities, often results in chronic HF. In such cases, patients are asked to abide by list of evidence-based clinical recommendations aimed at optimising their health, monitoring their symptoms and to engage appropriate decision-making to manage their signs and symptoms.<sup>6,7</sup> Recent studies show how HF patient outcomes are closely linked to their self-care, which is their ability to maintain their health through health promoting practices and illness management.<sup>7–10</sup>

Academic interest in self-care has grown following the development of middle range theories of reference,<sup>7</sup> with these theories facilitating efforts to investigate the relationship between self-care and clinical outcomes in HF patients. A high standard of self-care in HF patients is associated with improved quality of life,<sup>11,12</sup> reduced re-hospitalisations,<sup>13</sup> reduced mortality,<sup>14</sup> and lower healthcare costs.<sup>14</sup> Evidence shows that HF patients who participate in educational interventions aimed at improving self-care exhibit improvements in their emotional quality of life as well as overall health status after just 3 months.<sup>11,12</sup> Other studies indicate that poor self-care is an independent risk factor for adverse clinical outcomes in HF patients and re-hospitalisations.<sup>13</sup> These adverse clinical outcomes also include the death of HF patients with poor self-care.<sup>14</sup> One common characteristic of patients with poor self-care is a reduction in their use of HF-related medications over time (i.e. poor adherence). This implies a greater likelihood of re-hospitalization and an increase in healthcare costs; conversely, HF management in patients with adequate levels of self-care is far less taxing in terms of healthcare economic resources.<sup>14</sup>

1  
2  
3 In this scenario, gender differences are an important peculiarity of self-care. These gender  
4 differences, however, may be culturally determined. With this being the case, gender-specific  
5 educational interventions may be beneficial in addressing some of these gender-specific  
6 characteristics. Understanding these gender differences can inform interventions aimed at closing  
7 the gender gap and reducing inequalities in healthcare delivery.<sup>15</sup> Current research suggests a range  
8 of gender differences in chronic HF; however, the findings of these studies are often contradictory.  
9 For example, while some studies indicate that men have better self-care behaviours than women,<sup>16</sup>  
10 other studies demonstrate poor self-care behaviours amongst men.<sup>17</sup> That said, there is still much  
11 about gender differences in self-care that we do not know; for example, whether it is possible to  
12 estimate the likelihood of inadequate/adequate self-care in relation to gender in real-world cohorts.  
13 Understanding the peculiarities of how gender difference influence patients' self-care behaviours is  
14 important for planning appropriate treatment and education.<sup>5,18</sup>

15  
16  
17  
18  
19  
20  
21  
22  
23  
24  
25  
26  
27  
28  
29 Currently, the evidence base for understanding gender differences in patients with chronic HF is  
30 weak. What evidence exists in this regard is largely inferred by way of the secondary results of  
31 studies aimed to describing self-care. For this reason, the aim of this study was to critically analyse  
32 and describe gender differences related to self-care amongst patients with chronic HF. The results  
33 of this study make a significant contribution to our understanding of these gender and behavioural  
34 differences, and can provide a wealth of epidemiological information useful for planning future  
35 tailored interventions.

## 36 37 38 39 40 41 42 43 44 **Methods**

### 45 46 *Design and participants*

47  
48 This is an observational, single-centre design study using real-world convenience sampling. The  
49 sample includes all patients seen at a clinic in a research hospital located in San Donato (PSD),  
50 northern Italy. To be enrolled, all patients had to have a diagnosis of stable chronic HF and they had  
51 to have a recent craniological assessment (maximum 1 week before intake). Therefore, using real-  
52 world sampling, all patients with chronic HF related to a cardiac causes and assessed by their

1  
2  
3 cardiologist within 1 week prior to our study were eligible for participation.<sup>19</sup> Cardiological clinical  
4 assessment of the enrolled patients was performed in accordance with current guidelines.<sup>5</sup> All data  
5 was collected using a cross-sectional approach, between January and September 2017. The only  
6  
7 exclusion criteria for this study were: (a) inability to read and speak Italian, (b) diagnosis of  
8  
9 psychiatric or cognitive problems, and (c) patients aged under 18. Although this study used real-  
10  
11 world sampling, these exclusion criteria were necessary to ensure that participants could complete  
12  
13 all self-report instruments. All enrolled patients gave their written consent to participate. This study  
14  
15 was approved by the local Institutional Review Board of Policlinico San Donato (822/PSD/2017).  
16  
17  
18

### 19 *Measures*

20  
21  
22 We recorded data on participants' demographic and clinical characteristics. Self-care behaviours  
23  
24 were assessed before the patients discharge using the Self-Care of Heart Failure Index (SCHFI  
25  
26 v.6.2).  
27

28  
29 *Demographic and clinical characteristics.* We report on the following cohort demographic and  
30  
31 clinical characteristics: age, gender, nationality, Body Mass Index (BMI), New York Heart  
32  
33 Association (NYHA) functional classification, ejection fraction (EF), secondary cardiac diagnosis  
34  
35 associated to HF, and drug treatment. Given the real-world approach used in this study, we used the  
36  
37 Cumulative Illness Rating Scale (CIRS) to control for multiple forms of morbidity.<sup>20</sup> BMI was  
38  
39 categorised in accordance to the Centers for Disease Control and Prevention (CDC)  
40  
41 recommendations (i.e. underweight, healthy weight, overweight, obese).<sup>21</sup> Participants' NYHA  
42  
43 classification and HF were reported in line with current guidelines.<sup>5</sup> CIRS was used to evaluate  
44  
45 multi-morbidity, considering the gravity of comorbid medical conditions in 14 main domains. Each  
46  
47 domain represents a physiopathological system, with scores ranging 0–4 for the assessment; 0=*no*  
48  
49 *problem*, 4=*extremely severe problem*. The CIRS algorithm and subsequent indications result in an  
50  
51 overall score for comorbidities that ranges 0–4.<sup>20</sup> For this study, the authors used an online  
52  
53 calculator as provided by the Italian Society of Haematology.  
54  
55  
56  
57  
58  
59  
60



1  
2  
3 *Self-Care of Heart Failure Index* (version 6.2). SCHFI is a 22-item self-report instrument  
4 used to measure self-care in HF patients. The SCHFI measures self-care within a well-defined  
5 framework, having been developed using a situation-specific theory of reference.<sup>22</sup> The 22 items of  
6 the instrument are grouped according to three scales used to measure both self-care behaviours (i.e.  
7 self-care maintenance and self-care management), and the self-efficacy in performing said  
8 behaviours (i.e. self-care confidence). According to Riegel and colleagues, patients' self-care  
9 confidence is theorised to have an effect on patients' self-care behaviours and is not an element of  
10 self-care per se.<sup>23</sup> The two behavioural measures are self-care maintenance and self-care  
11 management. Self-care maintenance describes patients' level of engagement in behaviours aimed at  
12 maintaining their stability, monitoring their signs and symptoms and adhering to their treatment.  
13 Conversely, self-care management describes patients' ability to recognise their symptoms and to  
14 take appropriate treatment-orientated actions when needed (e.g. consult a healthcare provider, or  
15 reduce fluid intake). Each scale in the SCHFI uses a 4-point self-report response format, ranging  
16 1=*never or rarely* to 4=*always or daily*. To compute the score for each scale, raw scores must be  
17 transformed into standardised scores in the order of 0–100, following the procedure described in  
18 SCHFI validation studies.<sup>22,24</sup> Adequate self-care behaviours and self-care confidence are indicated  
19 by scores higher than 70.<sup>22,24</sup>

### 39 *Data analysis*

40  
41 All data was checked to assess for possible missing data, erroneous entries or outliers against a  
42 frequency distribution. Missing data was managed using a pairwise approach. A study of skewness  
43 was used to provide a preliminary assessment of the distribution of variables, which was followed  
44 by a Kolmogorov–Smirnov test. Continuous variables were expressed as mean and standard  
45 deviation (SD) for normally distributed data, while non-normally distributed variables were  
46 expressed as median and interquartile range (IQR). Categorical variables have been described by  
47 numbers and percentages. All data was preliminary tested via univariate analysis, where categorical  
48 variables were tested by contingency table analysis (i.e.  $\chi^2$  test or Fisher exact test, when  
49  
50  
51  
52  
53  
54  
55  
56  
57  
58  
59  
60

1  
2 appropriate), and continuous variable were tested by Mann–Whitney U test or Student’s *t*-test  
3 (when appropriate). A bivariate analysis was performed to assess the relationship between gender  
4 and other variables using point-polyserial correlation (R<sub>pp</sub>). Logistic regression (LR) models were  
5 used in the multivariable analysis to describe gender differences related to self-care maintenance,  
6 management and confidence. LR models were developed considering these univariate analysis  
7 interpretations and bivariate analysis, the theoretical rationale, precautions to avoid model overfit,<sup>25</sup>  
8 conformity with linear gradient for the included continuous variables, control of possible  
9 collinearity amongst the independent variables, the study of statistical significance using both  
10 Wald’s  $\chi^2$  and likelihood ratio test, an assessment of goodness-of-fit measures through the Hosmer–  
11 Lemeshow test, and the analysis of pseudo- $R^2$  (i.e. Cox and Snell; Nagelkerke and McFadden).<sup>25</sup>  
12 All predictor variables selected from the univariate analysis were entered simultaneously into the  
13 equation models to control for each other. Statistics were performed using SPSS (v.22, IBM  
14 Corporation) and R Statistical Package (R Foundation for Statistical Computing). All tests were  
15 two-tailed, setting a significance level of 5%.

### 16 *Patient and Public Involvement*

17 We carefully considered patients’ priorities, experience, and preferences during the process of  
18 informed consent counseling. All patients are informed about the ways to contact the principal  
19 investigation in case they wish to receive more information on the study development and findings.  
20 Patients’ active involvement was related to the sole period of data collection.

## 21 **Results**

### 22 *Sample*

23 A sample of 367 chronic HF patients were enrolled in this study. Participant characteristics are  
24 shown in Table 1. The majority of participants were male ( $n = 256$ ; 74.0%), with an average age of  
25 65.1 years (SD = 13.6). The mean BMI was 26.95 kg/m<sup>2</sup> (SD = 4.97). The majority of participants  
26 were satisfied criteria for NYHA class II ( $n = 199$ , 57.5%), with a preserved EF (pEF) ( $n = 163$ ;  
27  
28  
29  
30  
31  
32  
33  
34  
35  
36  
37  
38  
39  
40  
41  
42  
43  
44  
45  
46  
47  
48  
49  
50  
51  
52  
53  
54  
55  
56  
57  
58  
59  
60

1  
2  
3 47.1%). The most frequent secondary cardiac diagnosis associated with chronic HF was myocardial  
4 infarction ( $n = 225$ ; 65.0%), followed by hypertension ( $n = 176$ ; 50.9%) and atrial fibrillation ( $n =$   
5 111; 30.1%). Only 66 participants reported adequate self-care maintenance (18.0%), 28 participants  
6 had an adequate self-care management (7.6%), and 131 participants had an adequate self-  
7 confidence (35.7%).  
8  
9  
10  
11  
12

13 >Insert Table 1 About Here<

### 14 *Gender differences*

15  
16 Considering the bivariate analysis, gender (male = 1; female = 2) was significantly related to  
17 CIRS (Rpp = 0.157;  $p = 0.005$ ) and self-care maintenance (Rpp = -0.112;  $p = 0.025$ ) (where 1 =  
18 *adequate self-care maintenance*, 2 = *inadequate self-care maintenance*), self-care management  
19 (Rpp = -0.101;  $p = 0.046$ ) (where 1 = *adequate self-care management*, 2 = *inadequate self-care*  
20 *management*), self-care confidence (Rpp = +0.158;  $p = 0.011$ ) (where, 1 = *adequate self-care*  
21 *confidence*, 2 = *inadequate self-care confidence*). Therefore, male participants reported less  
22 comorbidity, as well as lower self-care maintenance and management scores, but higher self-care  
23 confidence.  
24  
25  
26  
27  
28  
29  
30  
31  
32  
33  
34

35 As shown in Table 2, according to the first LR model, the likelihood of inadequate self-care  
36 maintenance is reduced by roughly 80% when patients have adequate levels of self-care confidence  
37 (OR = 0.188; 95% CI = 0.042–0.843) and self-care management (OR = 0.182; 95% CI = 0.037–  
38 0.892), while males were found to be more than four times as likely as females to demonstrate  
39 inadequate self-care maintenance (OR = 4.596; 95% CI = 1.075–19.650). The second LR model  
40 shows that the likelihood of inadequate self-care management decreases by approximately 83%  
41 when patients have adequate maintenance (OR = 0.171; 95% CI = 0.036–0.816). No relationship  
42 was found between gender and self-care management. The third LR model shows that the  
43 likelihood of inadequate self-care confidence decreases by roughly 80% when patients have  
44 adequate levels of self-care maintenance (OR = 0.211; 95% CI = 0.051–0.869), and that males  
45 approximately 60% more likely to possess adequate self-care confidence than women (OR = 0.412;  
46  
47  
48  
49  
50  
51  
52  
53  
54  
55  
56  
57  
58  
59  
60

1  
2  
3 95% CI = 0.104–0.962). Moreover, every point reduction in the CIRS total score is associated with  
4  
5 a 70% increase in the likelihood of the patient possessing adequate levels of self-care confidence  
6  
7 (OR = 0.297; 95% CI = 0.102–0.865).  
8

9 >Please add Table 2<  
10

## 11 12 13 14 **Discussion** 15

16 To the best of our knowledge, this was the first study in last 5 years to have explored the issues  
17  
18 of gender differences in the self-care of patients with chronic HF. Understanding these gender  
19  
20 differences is important for informing evidence-based educational interventions aimed at improving  
21  
22 self-care behaviours within this patient population. Our results indicate that gender is strongly  
23  
24 correlated with self-care behaviours. Our LR models allow for the investigation of gender  
25  
26 differences using multivariable approaches, where self-care behaviours and self-care confidence are  
27  
28 treated as dichotomous outcomes (i.e. inadequate versus adequate). Specifically, gender is  
29  
30 significantly associated with self-care maintenance and self-care confidence, where males are more  
31  
32 than four times as likely to exhibit inadequate self-care maintenance than females. Males are also  
33  
34 approximately 60% more likely to describe having adequate self-care confidence than females.  
35  
36 These results present somewhat of a paradox, with current theories and evidence indicate that self-  
37  
38 care confidence should positively predict self-care behaviours.<sup>7,26,27</sup> Nonetheless, this paradox is  
39  
40 tangible in our results, considering the relationship between self-care confidence and adequate self-  
41  
42 care behaviours (Table 2). For example, we can see that men are significantly less likely than  
43  
44 women to demonstrate adequate levels of self-care maintenance, despite being roughly 60% more  
45  
46 likely than women to have adequate levels of self-care confidence.  
47  
48  
49

50  
51 In short, our understanding of gender differences in both Italian chronic HF patients and the  
52  
53 wider chronic HF population may be missing some important elements. Future investigations are  
54  
55 needed to better understand this paradox. Having a better understanding of these gender differences  
56  
57  
58  
59

1  
2  
3 might allow for the development of tailored educational intervention, specific to the needs of each  
4  
5 gender, prior to the patient's discharge. Patient education is an integral part of treatment and  
6  
7 rehabilitation;<sup>5</sup> therefore, understanding the nature of this paradox is important to ensure that the  
8  
9 efficacy of educational interventions is not undermined by gaps in knowledge concerning  
10  
11 educational best practice. To improve our understanding of this phenomenon, future investigations  
12  
13 should take into account the potential role of comorbidities related to mental disorders by measuring  
14  
15 depression and anxiety,<sup>28-30</sup> and by the determining the potential influence of self-delusion with  
16  
17 respect to self-care.<sup>31</sup> Literature suggests that patients with even minor depression exhibit lower  
18  
19 levels of self-care than patients with major depression, and women are more likely to present with  
20  
21 anxiety; however, there is currently no evidence of gender differences in terms of the self-care–  
22  
23 depression relationship.<sup>28</sup> Moreover, the greater self-care confidence of males should predict greater  
24  
25 self-care knowledge; however, there are no evidence that males have a deeper understanding of  
26  
27 their chronic HF than females. This could imply that the greater self-care confidence seen in males  
28  
29 is simply the product of a form of self-delusion.<sup>31</sup> Moreover, the effect of this self-delusion might  
30  
31 be enhanced when male patients are threatened by a perceived loss of autonomy and control, thus  
32  
33 providing one possible explanation for the aforementioned paradox.  
34  
35  
36

37 Notwithstanding, any evidence arising out of the study of gender differences needs to be  
38  
39 contextualised to the patients' cultural norms. Consequently, the literature describes a broad range  
40  
41 of conflicting results when the evidence of multisite international studies are compared. De facto,  
42  
43 evidence coming from United States shows that men are more likely to undertake independent  
44  
45 decisions about their self-care management, while women have higher self-care maintenance.<sup>16</sup>  
46  
47 Conversely, in our study, men seem to exhibit low levels of both self-care management and  
48  
49 maintenance, and higher levels of self-care confidence, which is what these patients bring to bear in  
50  
51 terms of self-efficacy to overcome their disease. These results are consistent with previous general  
52  
53 descriptions of Italian patients.<sup>17</sup> In recent years, there has been a growing interest in understanding  
54  
55 self-care gender differences in chronic diseases,<sup>32</sup> especially in patients with chronic HF, given  
56  
57  
58  
59  
60

1  
2  
3 evidence indicating that patients' self-care is improved considerably following the integration of  
4 educational strategies into their overall treatment plans.<sup>5</sup> Gender differences, however, are an  
5 important issue in self-care, especially given the evidence that gender is often a determinant of self-  
6 care.<sup>17</sup>  
7  
8  
9

10  
11 Consistent with current knowledge, the findings of this study confirm that Italian chronic HF  
12 patients have a high frequency of poor self-care.<sup>33</sup> These findings, with regard to the self-care of  
13 Italian chronic HF patients, are particularly valuable given the real-world sampling used in this  
14 study and the fact that participants had only recently completed their cardiological assessment. In  
15 fact, unlike previous self-care studies, all the patients in this study were enrolled close to their  
16 primary cardiology visit and not simply during follow-up. In other words, this study paints a  
17 realistic picture of chronic HF patients who have only recently received their clinical assessment  
18 and have been prescribed lifestyle adjustment therapies. Moreover, the description of patients' self-  
19 care deficits in our study is more disconcerting than in previous studies.<sup>17</sup> Previous studies have  
20 reported self-care behaviours in the range of 14.5–24.4%,<sup>17</sup> while the current study describes  
21 adequate self-care in the range of 7.6–18.0%. In this scenario, gender differences become readily  
22 apparent, starting from the bivariate analysis interpretation—where self-care behaviours and self-  
23 care confidence have a significant relationship with gender—towards the LR models analysis.  
24  
25  
26  
27  
28  
29  
30  
31  
32  
33  
34  
35  
36  
37  
38

39 Several recent studies have undertaken to explore the quality of the patient–caregiver  
40 relationship in relation to patients' self-care (i.e. mutuality).<sup>34,35</sup> It seems that positive patient–  
41 caregiver mutuality is associated with better patient self-care. These mutuality studies shape  
42 interdependence model paths and might also explain the paradoxical findings in our study, with  
43 patient–caregiver mutuality mediating the relationship between self-care confidence and self-care  
44 behaviours. In other words, it is reasonable to speculate that men might have a poorer quality  
45 relationship with their caregivers than women, where the males' caregivers play an important role  
46 helping their male partners to adhere to their clinical recommendation (e.g. sodium-restricted diet).  
47  
48  
49  
50  
51  
52  
53  
54  
55  
56  
57  
58  
59  
60

1  
2  
3 If this hypothesis can be corroborated with empirical evidence, then it is logical to include the  
4  
5 caregivers of male patients in any educational interventions.<sup>36</sup>  
6

### 7 *Strengths and limitations*

8  
9 This study has a number of limitations and strengths. Firstly, the design was cross-sectional  
10  
11 and sampling was not randomised. Moreover, this study was a single centre in Italy. Secondly, the  
12  
13 monocentric sampling used in this study was both a limitation and a strength given that the topic of  
14  
15 gender difference is so closely related to the contextual culture; as such, this approach depicts a  
16  
17 realistic image of the northern Italian reality. Another strength of this study is the real-world  
18  
19 sampling, which adds value to the realistic sense of the investigation. Moreover, to the best of our  
20  
21 knowledge, this was the first study of its kind to describe self-care as a dichotomous outcome, using  
22  
23 LR models. This approach simplifies the epidemiological interpretation of self-care characteristics,  
24  
25 owing to the likelihood interpretation coming from the adjusted OR of the independent variables of  
26  
27 the models. In fact, self-care characteristics are usually studied using structural equation modelling  
28  
29 approaches or path analysis, which are very useful latent multivariate approaches, but are less  
30  
31 intuitive from an epidemiological point of view.  
32  
33  
34

### 35 **Conclusion**

36  
37 Self-care is an important issue in multidisciplinary care management programmes aimed at  
38  
39 reducing the risk of HF hospitalisation and mortality. There is strong evidence attesting to the  
40  
41 clinical benefits of appropriate levels of self-care, as highlighted in the available guidelines.<sup>5</sup>  
42  
43 Notwithstanding, these interventions are far from foolproof and it is not clear what should constitute  
44  
45 best practice with respect to the development of tailored educational intervention to support chronic  
46  
47 HF patients. Nonetheless, more needs to be done to chronic HF patients successfully adjust to cope  
48  
49 with their self-care recommendations, follow-ups and lifestyle adjustments. In this scenario,  
50  
51 understanding gender differences in self-care can help to promote further research, the outcomes of  
52  
53 which can correctly guide healthcare providers in the provision of educational interventions  
54  
55 targeting the needs of this patient group. Our study helps to establish the foundations for such future  
56  
57  
58  
59

1  
2  
3 investigations and may provide some insights for healthcare providers looking to understand gender  
4  
5 differences in patients' presentation of self-care behaviours.

6  
7       Considering these proposals for future research, it is of paramount importance that some  
8  
9 consideration be afforded in relation to the complexity of the management of chronic HF. In fact, no  
10  
11 understanding of how gender differences impact patients' self-care can be complete without  
12  
13 factoring in the quality of the patient–caregiver relationship, which plays a pivotal role in  
14  
15 determining actual patient self-care behaviours. In other words, an individual's confidence in their  
16  
17 ability to achieve their clinical recommendations (e.g. physical exercise, dietary habits, the  
18  
19 recognition of signs and symptoms) may be mediated by their caregiver. As such, it is imperative  
20  
21 that this caregiver has an understanding of the recommendations on par with the patient. Future  
22  
23 research, however, is needed to corroborate this framework.

24  
25  
26       The results of this study also highlight an important issue related to the frequency of patients  
27  
28 with inadequate self-care. There is an urgent need of more awareness regarding the importance of  
29  
30 education during hospitalisation and follow-up. Timely educational interventions may be effective  
31  
32 in altering patients' self-care behaviours. To call attention to this important topic and to guide  
33  
34 follow-up educational priorities, we recommend the longitudinal screening of patients' self-care  
35  
36 behaviours during follow-up visits. This approach can also be useful for assessing the quality of the  
37  
38 patient–caregiver relationship, and could help to resolve some of the problems underpinning the  
39  
40 gender differences described here. Notwithstanding, we suggest that only validated instruments be  
41  
42 used to perform these assessments. In conclusion, further cross-cultural exploration of gender  
43  
44 differences in the self-care of patients with HF is needed to frame our knowledge in this field.

## 50 51 **References**

- 52  
53  
54 1.     Maggioni A Pietro. Epidemiology of Heart Failure in Europe. *Heart Fail Clin.* 2015;11(4):625-635.  
55       doi:10.1016/J.HFC.2015.07.015  
56  
57 2.     Acute Heart Failure Syndromes in the Elderly: The European Perspective. *Heart Fail Clin.*



- 2015;11(4):637-645. doi:10.1016/J.HFC.2015.07.010
3. Go AS, Mozaffarian D, Roger VL, et al. Executive summary: heart disease and stroke statistics--2014 update: a report from the American Heart Association. *Circulation*. 2014;129(3):399-410. doi:10.1161/01.cir.0000442015.53336.12
  4. Mozaffarian D, Benjamin EJ, Go AS, et al. Heart disease and stroke statistics--2015 update: a report from the American Heart Association. *Circulation*. 2015;131(4):e29-322. doi:10.1161/CIR.0000000000000152
  5. Ponikowski P, Voors AA, Anker SD, et al. 2016 ESC Guidelines for the diagnosis and treatment of acute and chronic heart failure: The Task Force for the diagnosis and treatment of acute and chronic heart failure of the European Society of Cardiology (ESC) Developed with the special contribution of. *Eur Heart J*. 2016;37(27):2129-2200. doi:10.1093/eurheartj/ehw128
  6. Ruppap TM, Delgado JM, Temple J. Medication adherence interventions for heart failure patients: A meta-analysis. *Eur J Cardiovasc Nurs*. 2015;14(5):395-404. doi:10.1177/1474515115571213
  7. Riegel B, Dickson VV, Faulkner KM. The Situation-Specific Theory of Heart Failure Self-Care: Revised and Updated. *J Cardiovasc Nurs*. 2016;31(3):226-235. doi:10.1097/JCN.0000000000000244
  8. Riegel B, Masterson Creber R, Hill J, Chittams J, Hoke L. Effectiveness of Motivational Interviewing in Decreasing Hospital Readmission in Adults With Heart Failure and Multimorbidity. *Clin Nurs Res*. 2016;25(4):362-377. doi:10.1177/1054773815623252
  9. Vellone E, Fida R, Ghezzi V, et al. Patterns of Self-care in Adults With Heart Failure and Their Associations With Sociodemographic and Clinical Characteristics, Quality of Life, and Hospitalizations: A Cluster Analysis. *J Cardiovasc Nurs*. 2017;32(2):180-189. doi:10.1097/JCN.0000000000000325
  10. Lee CS, Vellone E, Lyons KS, et al. Patterns and predictors of patient and caregiver engagement in heart failure care: a multi-level dyadic study. *Int J Nurs Stud*. 2015;52(2):588-597. doi:10.1016/j.ijnurstu.2014.11.005
  11. Dunbar SB, Reilly CM, Gary R, et al. Randomized Clinical Trial of an Integrated Self-Care Intervention for Persons with Heart Failure and Diabetes: Quality of Life and Physical Functioning Outcomes. *J Card Fail*. 2015;21(9). doi:10.1016/j.cardfail.2015.05.012
  12. Buck HG, Dickson VV, Fida R, et al. Predictors of hospitalization and quality of life in heart failure: A model of comorbidity, self-efficacy and self-care. *Int J Nurs Stud*. 2015;52(11):1714-1722. doi:10.1016/j.ijnurstu.2015.06.018
  13. Kato N, Kinugawa K, Nakayama E, et al. Insufficient self-care is an independent risk factor for adverse clinical outcomes in Japanese patients with heart failure. *Int Heart J*. 2013;54(6):382-389.
  14. Smith CE, Piamjariyakul U, Wick JA, et al. Multidisciplinary group clinic appointments: the Self-Management and Care of Heart Failure (SMAC-HF) trial. *Circ Heart Fail*. 2014;7(6):888-894. doi:10.1161/CIRCHEARTFAILURE.113.001246
  15. Regitz-Zagrosek V. Sex and gender differences in health. Science & Society Series on Sex and Science. *EMBO Rep*. 2012;13(7). doi:10.1038/embor.2012.87
  16. Dickson VV, Worrall-Carter L, Kuhn L, Riegel B. Whose job is it? Gender differences in perceived role in heart failure self-care. *J Nurs Healthc Chronic Illn*. 2011;3(2):99-108. doi:10.1111/j.1752-9824.2011.01084.x
  17. Cocchieri A, Riegel B, D'Agostino F, et al. Describing self-care in Italian adults with heart failure and identifying determinants of poor self-care. *Eur J Cardiovasc Nurs*. 2015;14(2):126-136. doi:10.1177/1474515113518443
  18. Ausili D, Rebora P, Di Mauro S, et al. Clinical and socio-demographic determinants of self-care

- behaviours in patients with heart failure and diabetes mellitus: A multicentre cross-sectional study. *Int J Nurs Stud.* 2016;63:18-27. doi:10.1016/j.ijnurstu.2016.08.006
19. Farré N, Vela E, Clèries M, et al. Real world heart failure epidemiology and outcome: A population-based analysis of 88,195 patients. *Ploze One.* 2017;12(2):e0172745. doi:10.1371/journal.pone.0172745
  20. Miller MD, Paradis CF, Houck PR, et al. Rating chronic medical illness burden in geropsychiatric practice and research: application of the Cumulative Illness Rating Scale. *Psychiatry Res.* 1992;41(3):237-248.
  21. Centers of Disease Control and Prevention (CDC). Assessing Your Weight | Healthy Weight | CDC.
  22. Riegel B, Carlson B, Moser DK, Sebern M, Hicks FD, Roland V. Psychometric testing of the self-care of heart failure index. *J Card Fail.* 2004;10(4):350-360.
  23. Riegel B, Lee CS, Dickson VV, Carlson B. An update on the self-care of heart failure index. *J Cardiovasc Nurs.* 2009;24(6):485-497. doi:10.1097/JCN.0b013e3181b4baa0
  24. Vellone E, Riegel B, Cocchieri A, et al. Psychometric testing of the self-care of heart failure index version 6.2. *Res Nurs Health.* 2013;36(5):500-511. doi:10.1002/nur.21554
  25. Sun GW, Shook TL, Kay GL. Inappropriate use of bivariable analysis to screen risk factors for use in multivariable analysis. *J Clin Epidemiol.* 1996;49(8):907-916.
  26. Riegel B, Jaarsma T, Strömberg A. A middle-range theory of self-care of chronic illness. *ANS Adv Nurs Sci.* 2012;35(3):194-204. doi:10.1097/ANS.0b013e318261b1ba
  27. Vellone E, Pancani L, Greco A, Steca P, Riegel B. Self-care confidence may be more important than cognition to influence self-care behaviors in adults with heart failure: Testing a mediation model. *Int J Nurs Stud.* 2016;60:191-199. doi:10.1016/j.ijnurstu.2016.04.016
  28. Müller-Tasch T, Löwe B, Lossnitzer N, et al. Anxiety and self-care behaviour in patients with chronic systolic heart failure: A multivariate model. *Eur J Cardiovasc Nurs.* 2018;17(2):170-177. doi:10.1177/1474515117722255
  29. Holzapfel N, Löwe B, Wild B, et al. Self-care and depression in patients with chronic heart failure. *Hear Lung J Acute Crit Care.* 2009;38(5):392-397. doi:10.1016/j.hrtlng.2008.11.001
  30. Riegel B, Moser DK, Anker SD, et al. State of the science: promoting self-care in persons with heart failure: a scientific statement from the American Heart Association. *Circulation.* 2009;120(12):1141-1163. doi:10.1161/CIRCULATIONAHA.109.192628
  31. Strömberg A. The crucial role of patient education in heart failure. *Eur J Heart Fail.* 2005;7(3):363-369. doi:10.1016/j.ejheart.2005.01.002
  32. Caruso R, Arrigoni C, Magon A, et al. Health Determinants In Italian Type 2 Diabetes Mellitus (T2DM) Patients: A Critical Gender Differences Analysis. *J Res Genet Stud.* 2017;7(2):93-108. doi:10.22381/JRGS7220176
  33. Dellafiore F, Borella A, Magon A, et al. Descriptive pilot study on self-care and daily living activities in Italian patients with heart failure: What are the criticalities? *Ric e Prat.* 2018;34(1):6-16. doi:10.1707/2860.28840
  34. Hooker SA, Schmiege SJ, Trivedi RB, Amoyal NR, Bekelman DB. Mutuality and heart failure self-care in patients and their informal caregivers. *Eur J Cardiovasc Nurs.* September 2017:Epub ahead of print. doi:10.1177/1474515117730184
  35. Vellone E, Dellafiore F, Chung ML, Alvaro R. Mutuality and self-care in heart failure patient and caregiver dyads. *Eur J Cardiovasc Nurs.* October 2017:1-2. doi:10.1177/1474515117740482
  36. Vellone E, Paturzo M, D'Agostino F, et al. MOTIVAtional intErviewing to improve self-care in

Heart Failure patients (MOTIVATE-HF): Study protocol of a three-arm multicenter randomized controlled trial. *Contemp Clin Trials*. 2017;55:34-38. doi:10.1016/j.cct.2017.02.003

**Table 1.** Sample characteristics (N = 346)

| <b>Demography</b>                         |                          | <b>N (%)</b> |
|-------------------------------------------|--------------------------|--------------|
| Mean (SD),                                | Age (Years)              | 65.6 (13.6)  |
|                                           | Gender (male/female)     | 61.1%/38.9%  |
|                                           | Nationality (Italian)    | 100%         |
| <b>Anthropometry</b>                      |                          |              |
| Mean (SD),                                | BMI (kg/m <sup>2</sup> ) | 26.95 (4.97) |
| <b>Clinical characteristics</b>           |                          |              |
|                                           | Class II                 | 256 (74.0%)  |
|                                           | Class III                | 82 (23.7%)   |
|                                           | Class IV                 | 8 (2.3%)     |
|                                           | rEF (<40%)               | 82 (23.7%)   |
|                                           | MrEF (40-50%)            | 101 (29.2%)  |
|                                           | pEF (≥50%)               | 163 (47.1%)  |
|                                           | CIRS total score 0       | 270 (78.0%)  |
|                                           | CIRS total score 1       | 50 (14.5%)   |
|                                           | CIRS total score 2       | 26 (7.5%)    |
| <b>Secondary Cardiac Diagnosis</b>        |                          |              |
|                                           | Myocardial Infarction    | 225 (65.0%)  |
|                                           | Hypertension             | 176 (50.9%)  |
|                                           | Atrial Fibrillation      | 111 (30.1%)  |
| <b>Drug treatment</b>                     |                          |              |
|                                           | ACE inhibitors           | 73 (21.1%)   |
|                                           | B-blockers               | 87 (25.1%)   |
|                                           | Diuretics                | 270 (78.0%)  |
|                                           | Cardiac glycosides       | 160 (46.2%)  |
|                                           | Aspirin or salicylates   | 222 (64.2%)  |
|                                           | Calcium channel blockers | 74 (21.4%)   |
| <b>'Adequate' Self-care (scores ≥ 70)</b> |                          |              |
|                                           | Maintenance              | 66 (18.0%)   |
|                                           | Management               | 28 (7.6%)    |
|                                           | Confidence               | 131 (35.7%)  |

1  
2  
3  
4  
5  
6  
7  
8  
9  
10  
11  
12  
13  
14  
15  
16  
17  
18  
19  
20  
21  
22  
23  
24  
25  
26  
27  
28  
29  
30  
31  
32  
33  
34  
35  
36  
37  
38  
39  
40  
41  
42  
43  
44  
45  
46  
47  
48  
49  
50  
51  
52  
53  
54  
55  
56  
57  
58  
59  
60

For peer review only

**Table 2.** Models of Logistic Regression analysis

| <b>Maintenance</b> |                                      |                                   |             |                |                                                      |                                                 |                                               |
|--------------------|--------------------------------------|-----------------------------------|-------------|----------------|------------------------------------------------------|-------------------------------------------------|-----------------------------------------------|
| <b>Predictors</b>  |                                      | <b>Wald's <math>\chi^2</math></b> | <b>d.f.</b> | <b>P-Value</b> | <b>Odds Ratio</b>                                    | <b>95% CI</b>                                   |                                               |
|                    | Constant                             | 2.356                             | 1           | 0.125          | -                                                    | -                                               | -                                             |
|                    | Confidence (Adequate vs Inadequate)  | 4.767                             | 1           | 0.029          | 0.188                                                | 0.042                                           | 0.843                                         |
|                    | Management (Adequate vs Inadequate)  | 4.413                             | 1           | 0.036          | 0.182                                                | 0.037                                           | 0.892                                         |
|                    | CIRS                                 | 2.314                             | 1           | 0.128          | 2.909                                                | 0.735                                           | 11.512                                        |
|                    | Gender (Male vs Female)              | 4.232                             | 1           | 0.04           | 4.596                                                | 1.075                                           | 19.650                                        |
| <b>Model</b>       |                                      | <b><math>\chi^2</math></b>        | <b>d.f.</b> | <b>P-Value</b> | <b>Pseudo-<math>R^2</math><br/>(Cox &amp; Snell)</b> | <b>Pseudo-<math>R^2</math><br/>(Nagelkerke)</b> | <b>Pseudo-<math>R^2</math><br/>(McFadden)</b> |
|                    | Likelihood ratio test                | 18.69                             | 9           | 0.028          | 0.241                                                | 0.351                                           | 0.238                                         |
|                    | Hosmer–Lemeshow test                 | 4.185                             | 6           | 0.665          | -                                                    | -                                               | -                                             |
| <b>Management</b>  |                                      |                                   |             |                |                                                      |                                                 |                                               |
| <b>Predictors</b>  |                                      | <b>Wald's <math>\chi^2</math></b> | <b>d.f.</b> | <b>P-Value</b> | <b>Odds Ratio</b>                                    | <b>95% CI</b>                                   |                                               |
|                    | Constant                             | 0.799                             | 1           | 0.271          | -                                                    | -                                               | -                                             |
|                    | Confidence (Adequate vs Inadequate)  | 1.992                             | 1           | 0.158          | 0.318                                                | 0.065                                           | 1.561                                         |
|                    | Maintenance (Adequate vs Inadequate) | 4.902                             | 1           | 0.027          | 0.171                                                | 0.036                                           | 0.816                                         |
|                    | CIRS                                 | 0.265                             | 1           | 0.607          | 0.729                                                | 0.219                                           | 2.429                                         |
|                    | Gender (Male vs Female)              | 0.88                              | 1           | 0.348          | 2.126                                                | 0.440                                           | 10.284                                        |
| <b>Model</b>       |                                      | <b><math>\chi^2</math></b>        | <b>d.f.</b> | <b>P-Value</b> | <b>Pseudo-<math>R^2</math><br/>(Cox &amp; Snell)</b> | <b>Pseudo-<math>R^2</math><br/>(Nagelkerke)</b> | <b>Pseudo-<math>R^2</math><br/>(McFadden)</b> |
|                    | Likelihood ratio test                | 16.3                              | 9           | 0.049          | 0.218                                                | 0.336                                           | 0.241                                         |
|                    | Hosmer–Lemeshow test                 | 3.404                             | 6           | 0.696          | -                                                    | -                                               | -                                             |
| <b>Confidence</b>  |                                      |                                   |             |                |                                                      |                                                 |                                               |
| <b>Predictors</b>  |                                      | <b>Wald's <math>\chi^2</math></b> | <b>d.f.</b> | <b>P-Value</b> | <b>Odds Ratio</b>                                    | <b>95%CI</b>                                    |                                               |
|                    | Constant                             | 2.758                             | 1           | 0.097          | -                                                    | -                                               | -                                             |
|                    | Maintenance (Adequate vs Inadequate) | 4.644                             | 1           | 0.031          | 0.211                                                | 0.051                                           | 0.869                                         |
|                    | Management (Adequate vs Inadequate)  | 1.906                             | 1           | 0.167          | 0.332                                                | 0.069                                           | 1.589                                         |
|                    | CIRS                                 | 4.953                             | 1           | 0.026          | 0.297                                                | 0.102                                           | 0.865                                         |
|                    | Gender (Male vs Female)              | 1.474                             | 1           | 0.035          | 0.412                                                | 0.104                                           | 0.962                                         |

1  
2  
3  
4  
5  
6  
7  
8  
9  
10  
11  
12  
13  
14  
15  
16  
17  
18  
19  
20  
21  
22  
23  
24  
25  
26  
27  
28  
29  
30  
31  
32  
33  
34  
35  
36  
37  
38  
39  
40  
41  
42  
43  
44  
45  
46  
47

| Model                 | $\chi^2$ | d.f. | P-Value | Pseudo- $R^2$<br>(Cox & Snell) | Pseudo- $R^2$<br>(Nagelkerke) | Pseudo- $R^2$<br>(McFadden) |
|-----------------------|----------|------|---------|--------------------------------|-------------------------------|-----------------------------|
| Likelihood ratio test | 17.8     | 9    | 0.044   | 0.221                          | 0.314                         | 0.221                       |
| Hosmer–Lemeshow test  | 1.604    | 4    | 0.708   | -                              | -                             | -                           |

Abbreviations: CIRS, Cumulative Illness Rating Scale; d.f., degree of freedom; CI, Confidence Interval

For peer review only

**STROBE 2007 (v4) Statement—Checklist of items that should be included in reports of *cross-sectional studies***

| Section/Topic                | Item # | Recommendation                                                                                                                                                                       | Reported on page # |
|------------------------------|--------|--------------------------------------------------------------------------------------------------------------------------------------------------------------------------------------|--------------------|
| Title and abstract           | 1      | (a) Indicate the study's design with a commonly used term in the title or the abstract                                                                                               | 1-2                |
|                              |        | (b) Provide in the abstract an informative and balanced summary of what was done and what was found                                                                                  | 2                  |
| <b>Introduction</b>          |        |                                                                                                                                                                                      |                    |
| Background/rationale         | 2      | Explain the scientific background and rationale for the investigation being reported                                                                                                 | 4-5                |
| Objectives                   | 3      | State specific objectives, including any prespecified hypotheses                                                                                                                     | 5                  |
| <b>Methods</b>               |        |                                                                                                                                                                                      |                    |
| Study design                 | 4      | Present key elements of study design early in the paper                                                                                                                              | 5                  |
| Setting                      | 5      | Describe the setting, locations, and relevant dates, including periods of recruitment, exposure, follow-up, and data collection                                                      | 5-6                |
| Participants                 | 6      | (a) Give the eligibility criteria, and the sources and methods of selection of participants                                                                                          | 5-6                |
| Variables                    | 7      | Clearly define all outcomes, exposures, predictors, potential confounders, and effect modifiers. Give diagnostic criteria, if applicable                                             | 6-7                |
| Data sources/<br>measurement | 8*     | For each variable of interest, give sources of data and details of methods of assessment (measurement). Describe comparability of assessment methods if there is more than one group | 6-7                |
| Bias                         | 9      | Describe any efforts to address potential sources of bias                                                                                                                            | 7                  |
| Study size                   | 10     | Explain how the study size was arrived at                                                                                                                                            | 5                  |
| Quantitative variables       | 11     | Explain how quantitative variables were handled in the analyses. If applicable, describe which groupings were chosen and why                                                         | 7-8                |
| Statistical methods          | 12     | (a) Describe all statistical methods, including those used to control for confounding                                                                                                | 7-8                |
|                              |        | (b) Describe any methods used to examine subgroups and interactions                                                                                                                  | 7-8                |
|                              |        | (c) Explain how missing data were addressed                                                                                                                                          | 7-8                |
|                              |        | (d) If applicable, describe analytical methods taking account of sampling strategy                                                                                                   | na                 |
|                              |        | (e) Describe any sensitivity analyses                                                                                                                                                | 7-8                |
| <b>Results</b>               |        |                                                                                                                                                                                      |                    |

|                          |     |                                                                                                                                                                                                                                                                                                                                                                                                               |                   |
|--------------------------|-----|---------------------------------------------------------------------------------------------------------------------------------------------------------------------------------------------------------------------------------------------------------------------------------------------------------------------------------------------------------------------------------------------------------------|-------------------|
| Participants             | 13* | (a) Report numbers of individuals at each stage of study—eg numbers potentially eligible, examined for eligibility, confirmed eligible, included in the study, completing follow-up, and analysed<br>(b) Give reasons for non-participation at each stage<br>(c) Consider use of a flow diagram                                                                                                               | 8                 |
| Descriptive data         | 14* | (a) Give characteristics of study participants (eg demographic, clinical, social) and information on exposures and potential confounders<br>(b) Indicate number of participants with missing data for each variable of interest                                                                                                                                                                               | 8                 |
| Outcome data             | 15* | Report numbers of outcome events or summary measures                                                                                                                                                                                                                                                                                                                                                          | 8-9               |
| Main results             | 16  | (a) Give unadjusted estimates and, if applicable, confounder-adjusted estimates and their precision (eg, 95% confidence interval). Make clear which confounders were adjusted for and why they were included<br>(b) Report category boundaries when continuous variables were categorized<br>(c) If relevant, consider translating estimates of relative risk into absolute risk for a meaningful time period | 8-9<br>8-9<br>8-9 |
| Other analyses           | 17  | Report other analyses done—eg analyses of subgroups and interactions, and sensitivity analyses                                                                                                                                                                                                                                                                                                                | na                |
| <b>Discussion</b>        |     |                                                                                                                                                                                                                                                                                                                                                                                                               |                   |
| Key results              | 18  | Summarise key results with reference to study objectives                                                                                                                                                                                                                                                                                                                                                      | 9-10-11           |
| Limitations              | 19  | Discuss limitations of the study, taking into account sources of potential bias or imprecision. Discuss both direction and magnitude of any potential bias                                                                                                                                                                                                                                                    | 11                |
| Interpretation           | 20  | Give a cautious overall interpretation of results considering objectives, limitations, multiplicity of analyses, results from similar studies, and other relevant evidence                                                                                                                                                                                                                                    | 11-12             |
| Generalisability         | 21  | Discuss the generalisability (external validity) of the study results                                                                                                                                                                                                                                                                                                                                         | 12                |
| <b>Other information</b> |     |                                                                                                                                                                                                                                                                                                                                                                                                               |                   |
| Funding                  | 22  | Give the source of funding and the role of the funders for the present study and, if applicable, for the original study on which the present article is based                                                                                                                                                                                                                                                 | 16                |

\*Give information separately for cases and controls in case-control studies and, if applicable, for exposed and unexposed groups in cohort and cross-sectional studies.

**Note:** An Explanation and Elaboration article discusses each checklist item and gives methodological background and published examples of transparent reporting. The STROBE checklist is best used in conjunction with this article (freely available on the Web sites of PLoS Medicine at <http://www.plosmedicine.org/>, Annals of Internal Medicine at <http://www.annals.org/>, and Epidemiology at <http://www.epidem.com/>). Information on the STROBE Initiative is available at [www.strobe-statement.org](http://www.strobe-statement.org).
